# Supplementary material for: Silver-mediated radical oxytrifluoromethylation of unsaturated carboxylic acids for the synthesis of γ-trifluoromethylthio lactones
Source: Royal Society of Chemistry journal article supplement (doi:10.1039/d2ob00018k), 2022-01-01

## **Silver-Mediated Radical Oxytrifluoromethylation of Unstaurated Carboxylic Acids for the Synthesis of $\gamma$ -Trifluoromethylthio Lactones**

Ru-Jian, Yu; Chun-Yan, Zhang; Hai-Yan, Huang; Pei, Wang; Wen-Yu, Fu; Jian-Xin, Cheng; Yan-Shi, Xiong\*

School of Pharmacy, Jiangxi Science & Technology Normal University, Nanchang,

330013 Jiangxi, P. R.China. E-mail: xiongys1214@163.com

### **Table of Contents**

|                                      |           |
|--------------------------------------|-----------|
| <b>1. General Information</b> .....  | <b>S2</b> |
| <b>2. Experimental Section</b> ..... | <b>S2</b> |
| <b>3. NMR Spectra</b> .....          | <b>S3</b> |

## 1. General information

**Reagents and solvents.** All starting materials, which were purchased from commercial sources, were used without further purification. Solvents for column chromatography were technical standard. Column chromatography was performed with silica gel 200-400 mesh.  $^1\text{H}$ ,  $^{13}\text{C}$  and  $^{19}\text{F}$  NMR spectra were recorded on Bruker Avance 400 Mhz or 500 Mhz spectrometer. Chemical shifts in  $^1\text{H}$  NMR spectra were reported in parts per million (ppm) downfield from the internal standard  $\text{Me}_4\text{Si}$  (TMS). Chemical shifts in  $^{13}\text{C}$  NMR spectra were reported relative to the central line of the chloroform signal ( $\delta = 77.0$  ppm). Peaks were labelled as singlet (s), doublet (d), triplet (t), quarter (q), and multiplet (m). High resolution mass spectra were obtained with a Shimadzu LCMS-IT-TOF mass spectrometer. Analytical TLC was performed using EM separations percolated silica gel 0.2 mm layer UV 254 fluorescent sheets.

## 2. Experiment Section

### 2.1 General procedures for preparation of 3.

Into an oven-dried sealed tube was added 4-phenylpent-4-enoic acid **1** (0.05 mmol),  $\text{AgSCF}_3$  **2** (0.06 mmol),  $\text{K}_2\text{S}_2\text{O}_8$  (40.5 mg, 0.15 mmol), and  $\text{CH}_3\text{CN}$  (0.5 mL). The mixture was stirred at 80 °C for 12 hours until the complete consumption of **1** as monitored by TLC analysis. The reaction mixture was then diluted with water and extracted with ethyl acetate. After the combined organic layers were washed with brine, dried

over Na<sub>2</sub>SO<sub>4</sub>, and concentrated under reduced pressure, the residue was purified by flash column chromatography on silica gel using petroleum ether/ethyl acetate as the eluent (10:1, V/V) to afford the pure product **3**.

## 2.2 Mechanism investigation

### Procedures for the radical trapping and control experiment

Into an oven-dried sealed tube was added 4-phenylpent-4-enoic acid **1** (0.05 mmol), AgSCF<sub>3</sub> **2** (0.06 mmol), K<sub>2</sub>S<sub>2</sub>O<sub>8</sub> (40.5 mg, 0.15 mmol), and CH<sub>3</sub>CN (0.5 mL). The mixture was stirred at 80 °C for 12 hours under N<sub>2</sub> protect, until the complete consumption of **1** as monitored by TLC analysis. The reaction mixture was then diluted with water and extracted with ethyl acetate. After the combined organic layers were washed with brine, dried over Na<sub>2</sub>SO<sub>4</sub>, and concentrated under reduced pressure, the residue was purified by flash column chromatography on silica gel using petroleum ether/ethyl acetate as the eluent (10:1, V/V) to afford the pure product **3**.

Into an oven-dried sealed tube was added 4-phenylpent-4-enoic acid **1** (0.05 mmol), AgSCF<sub>3</sub> **2** (0.06 mmol), K<sub>2</sub>S<sub>2</sub>O<sub>8</sub> (40.5 mg, 0.15 mmol), 2,2,6,6-tetramethylpiperidineoxy (TEMPO, 23.4 mg, 0.15 mmol) and CH<sub>3</sub>CN (0.5 mL), No special precautions were taken to exclude moisture and air, The mixture was stirred at 80 °C for 12 hours.

Into an oven-dried sealed tube was added 4-phenylpent-4-enoic acid **1** (0.05 mmol), AgSCF<sub>3</sub> **2** (0.06 mmol), K<sub>2</sub>S<sub>2</sub>O<sub>8</sub> (40.5 mg, 0.15 mmol),

2,6-di-*tert*-butyl-4-methylphenol (BHT, 33.0 mg, 0.15 mmol) and CH<sub>3</sub>CN (0.5 mL), No special precautions were taken to exclude moisture and air, The mixture was stirred at 80 °C for 12 hours.

### **Procedures of 1a reacted with 5**

To a solution of AgSCF<sub>3</sub> (0.1 mmol), TABI (0.5 mmol), K<sub>2</sub>S<sub>2</sub>O<sub>8</sub> (0.3 mmol) and 1 mL MeCN was added, the mixture was exchange with N<sub>2</sub> three times and stirred at 80 °C for 2 hours. The mixture **5** without purification and directed used for the next reaction, one tube was added K<sub>2</sub>S<sub>2</sub>O<sub>8</sub> (0.3 mmol) and AgNO<sub>3</sub> (0.01 mmol), No special precautions were taken to exclude moisture and air, The mixture was stirred at 80 °C for 12 hours. The other ube was added K<sub>2</sub>S<sub>2</sub>O<sub>8</sub> (0.3 mmol), No special precautions were taken to exclude moisture and air, The mixture was stirred at 80 °C for 12 hours.

### 3. NMR Spectra

#### Compound 3a

#### <sup>1</sup>H NMR

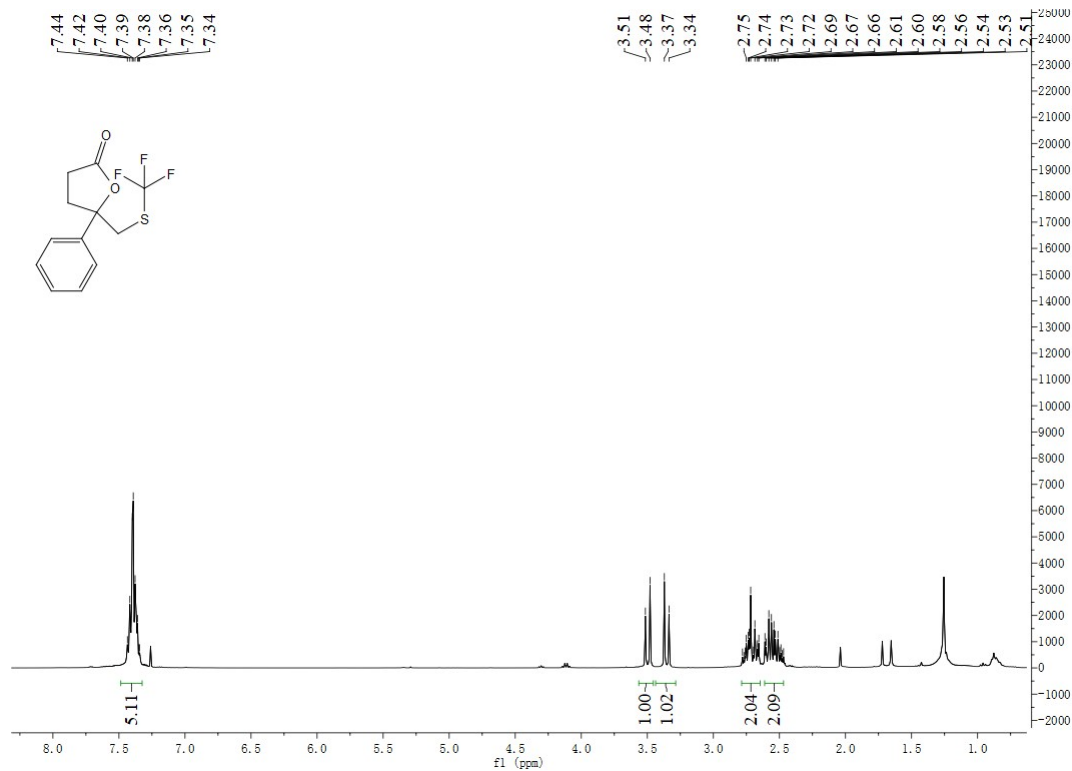

#### <sup>13</sup>C NMR

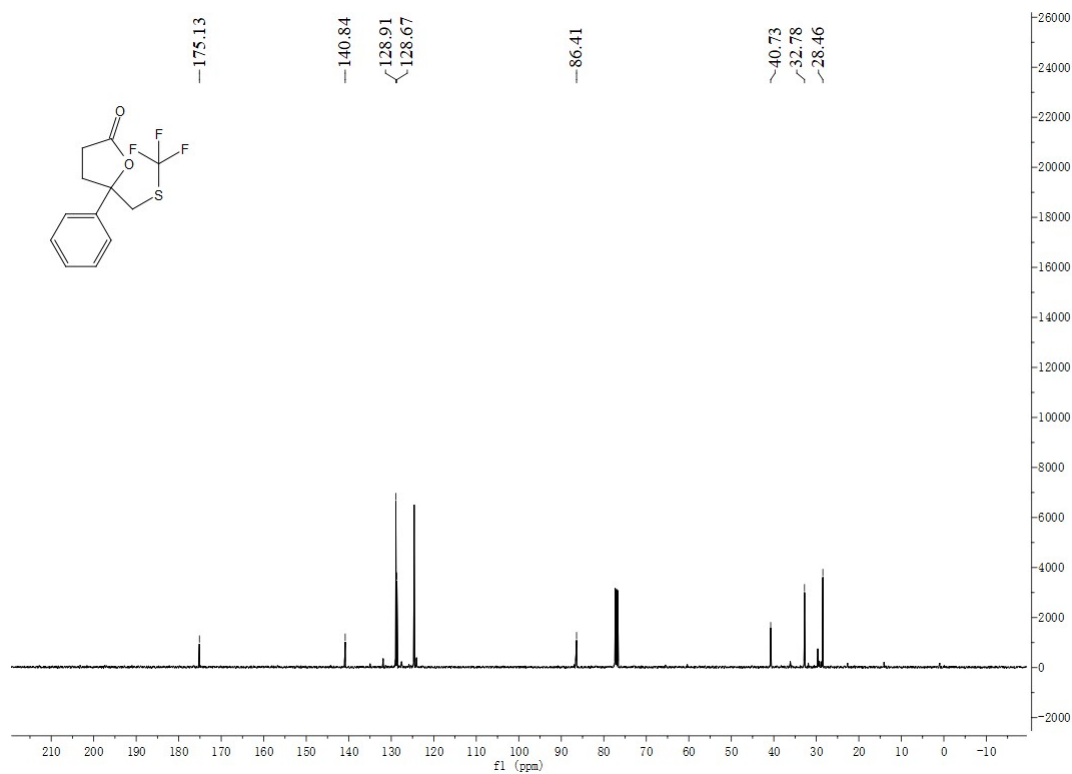



# <sup>19</sup>F NMR

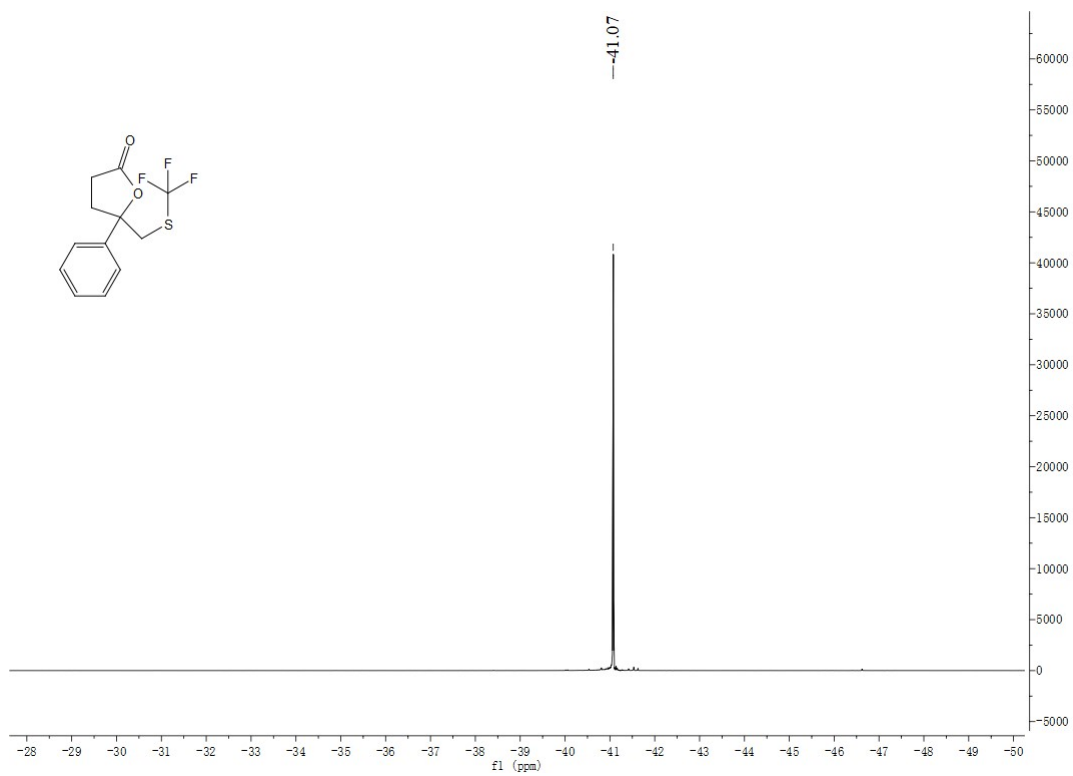

# Compound 3b

## <sup>1</sup>H NMR

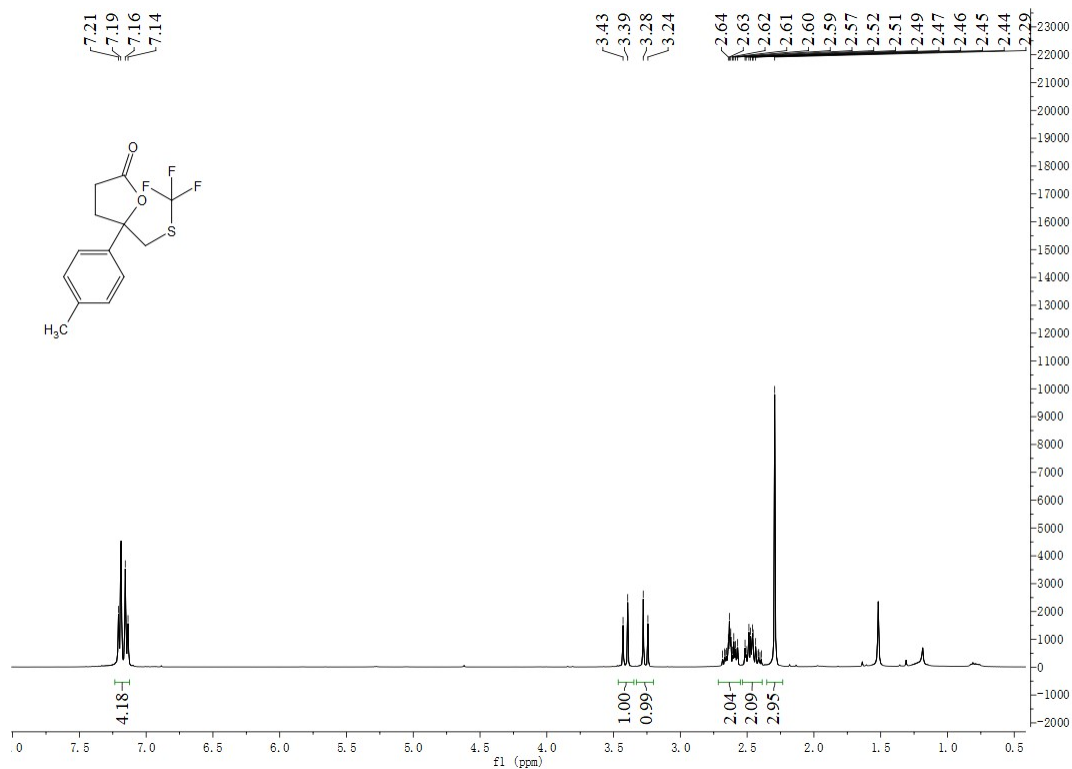

## <sup>13</sup>C NMR

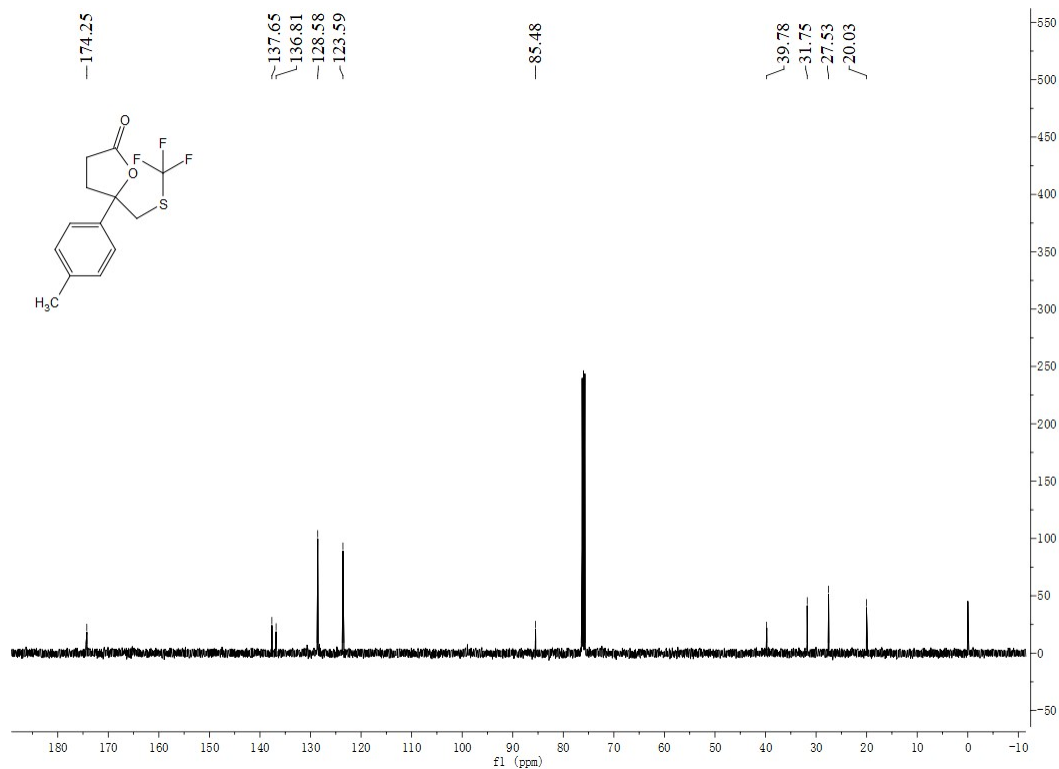



# <sup>19</sup>F NMR

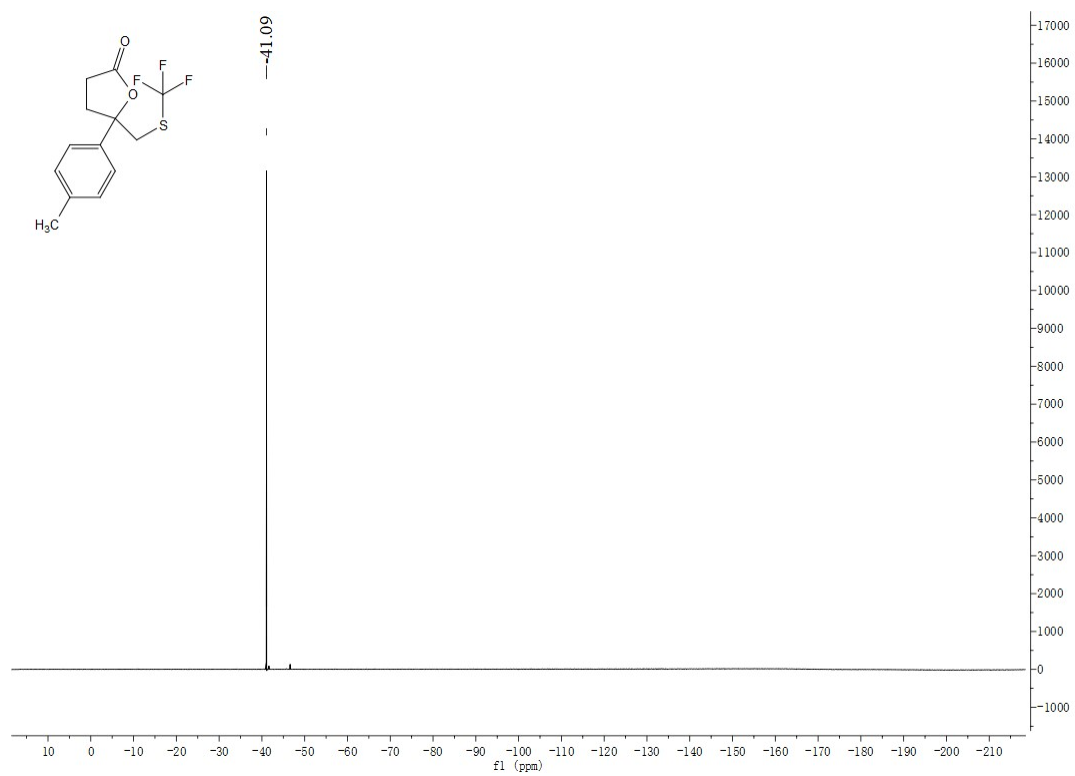

# Compound 3c

## <sup>1</sup>H NMR

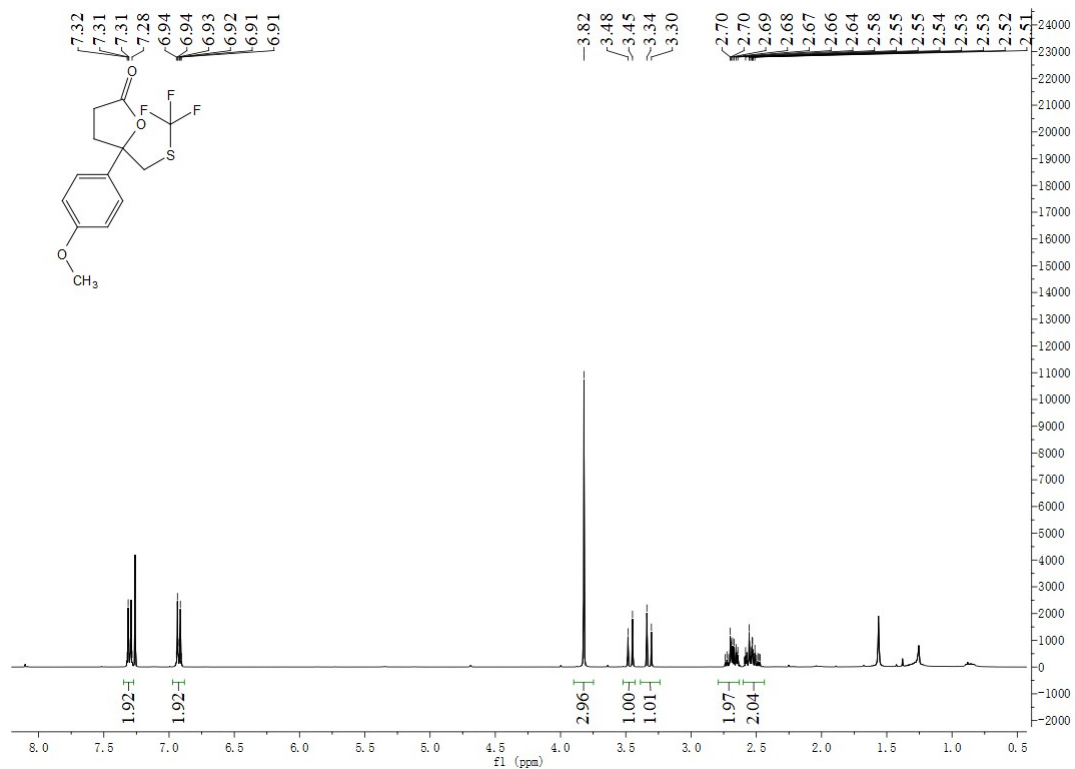

## <sup>13</sup>C NMR

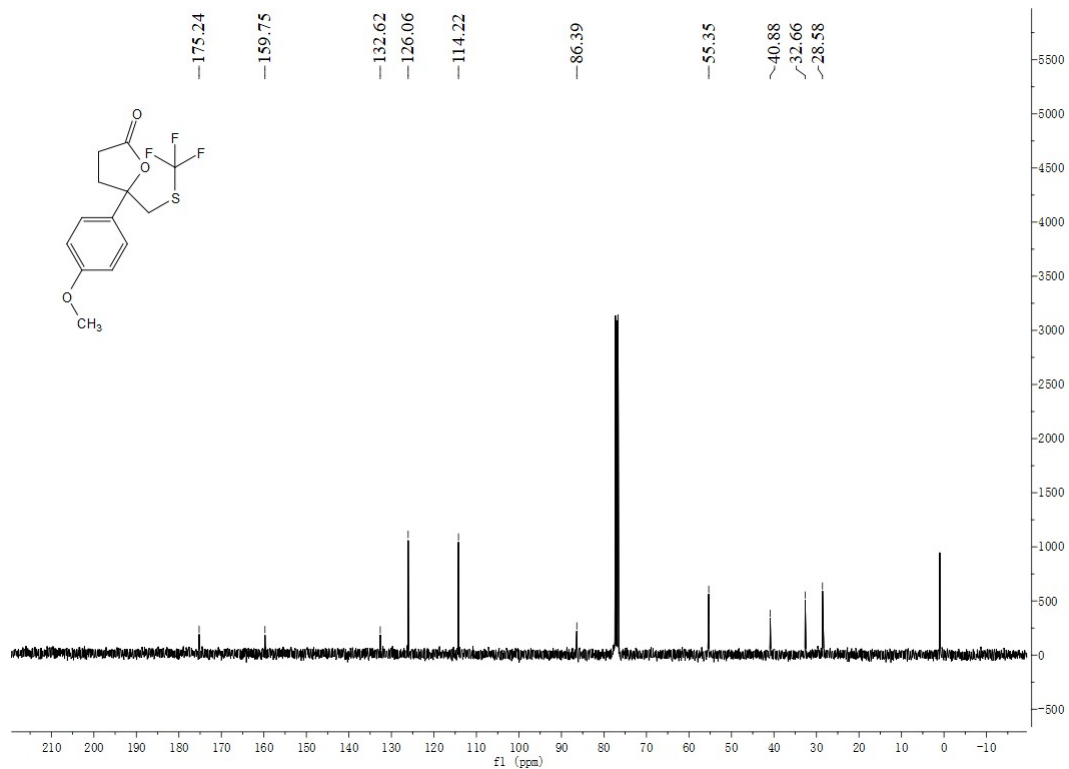

# <sup>19</sup>F NMR

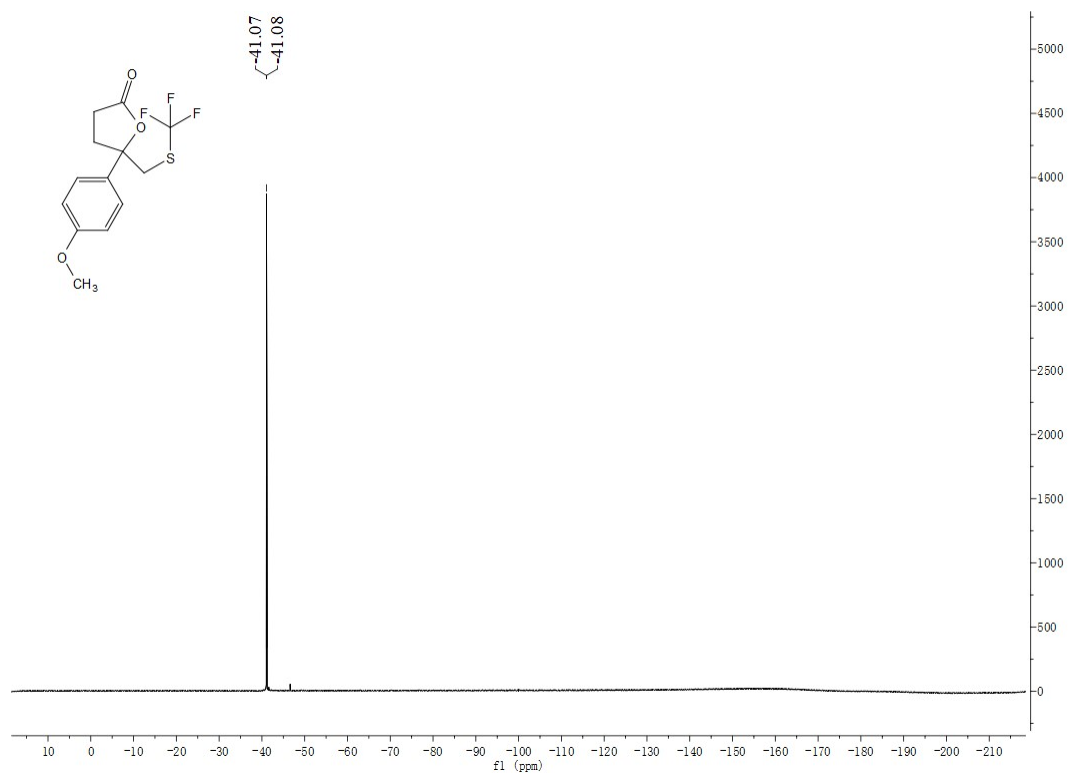

# Compound 3d

## <sup>1</sup>H NMR

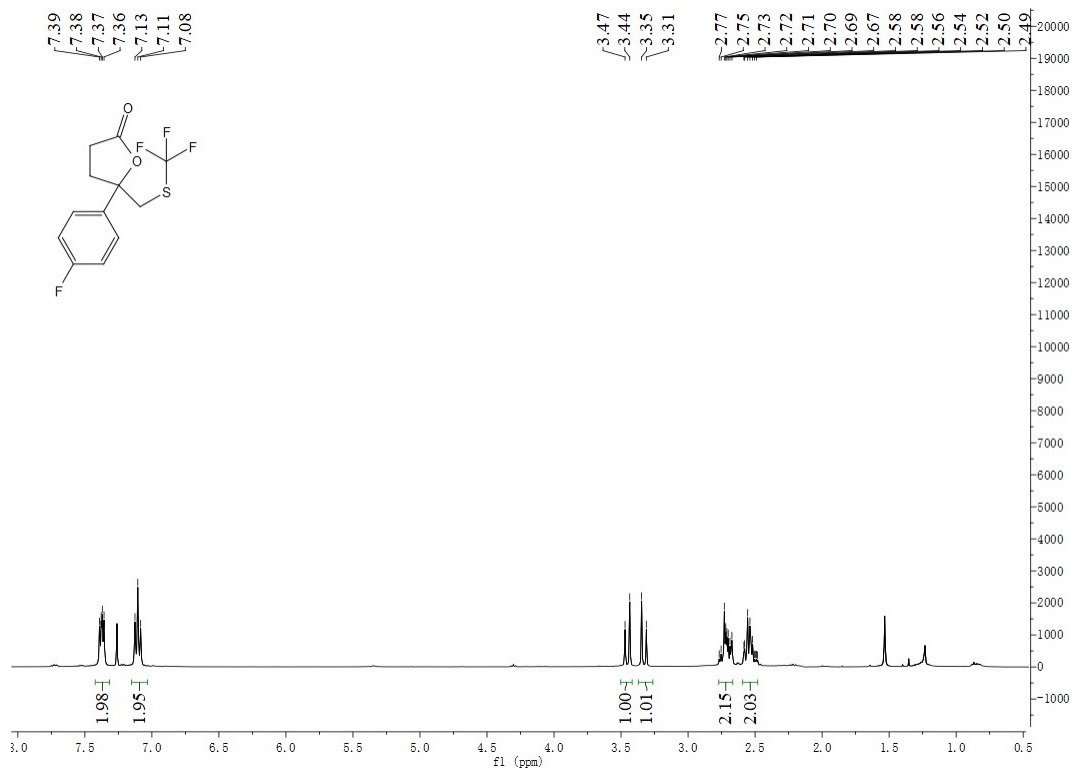

## <sup>13</sup>C NMR

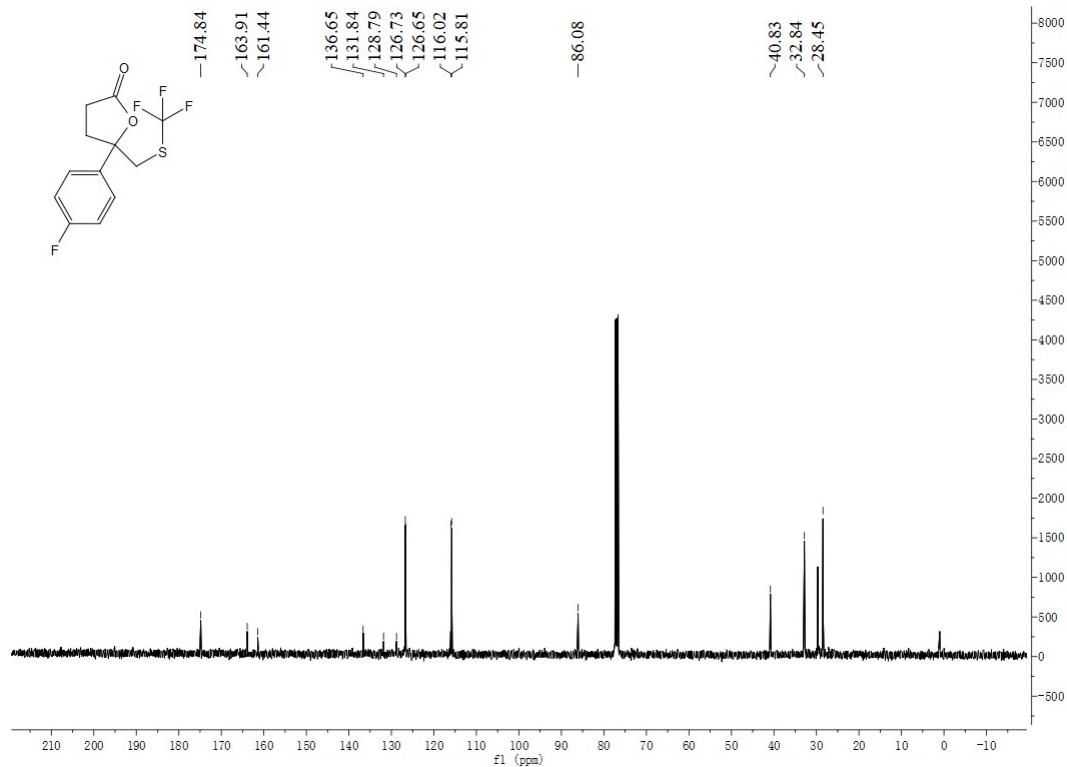

# <sup>19</sup>F NMR

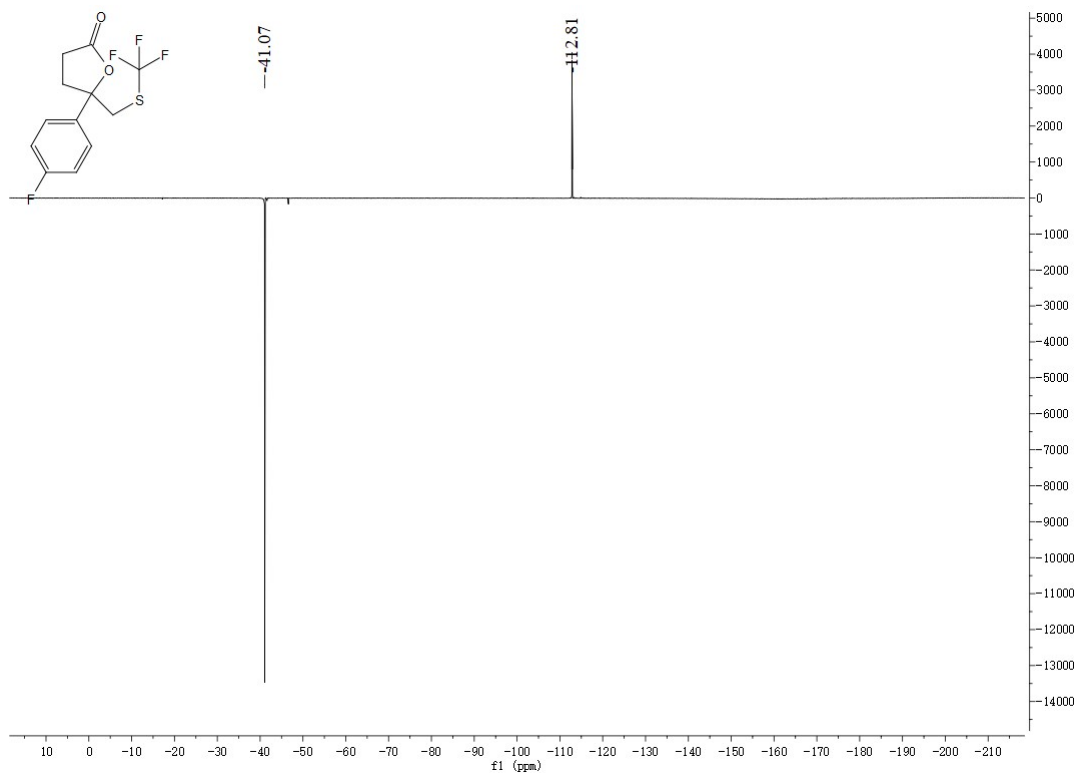

# Compound 3e

## <sup>1</sup>H NMR

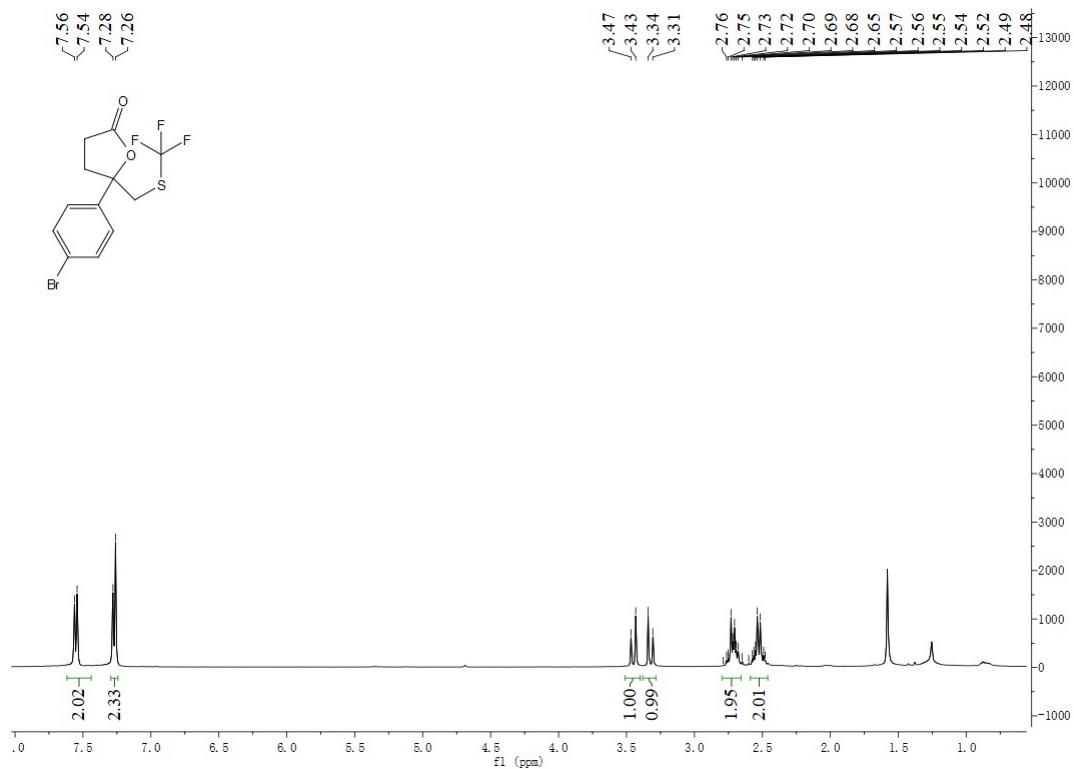

## <sup>13</sup>C NMR

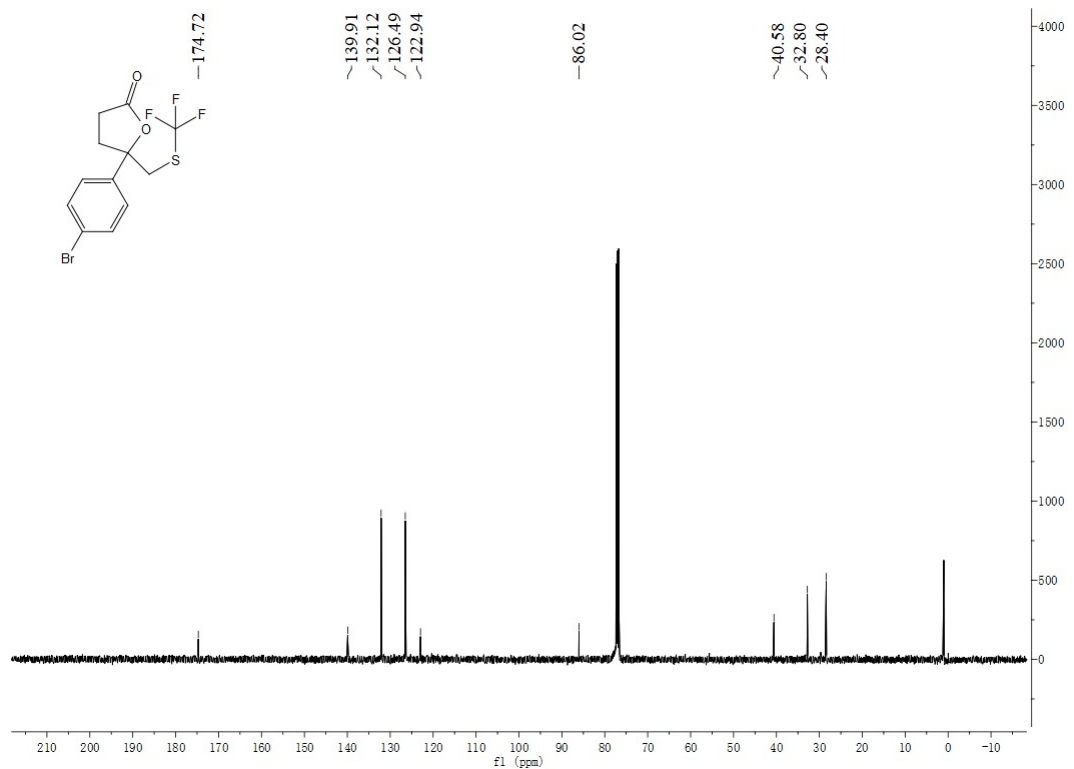

# <sup>19</sup>F NMR

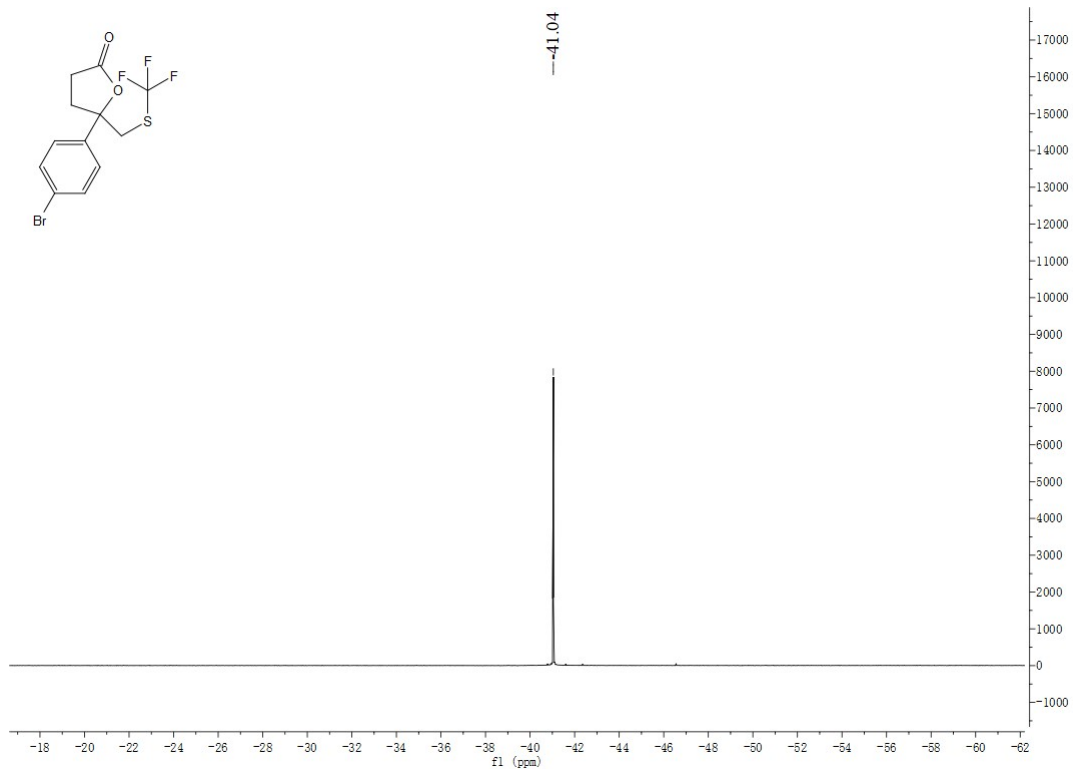

# Compound 3f

## <sup>1</sup>H NMR

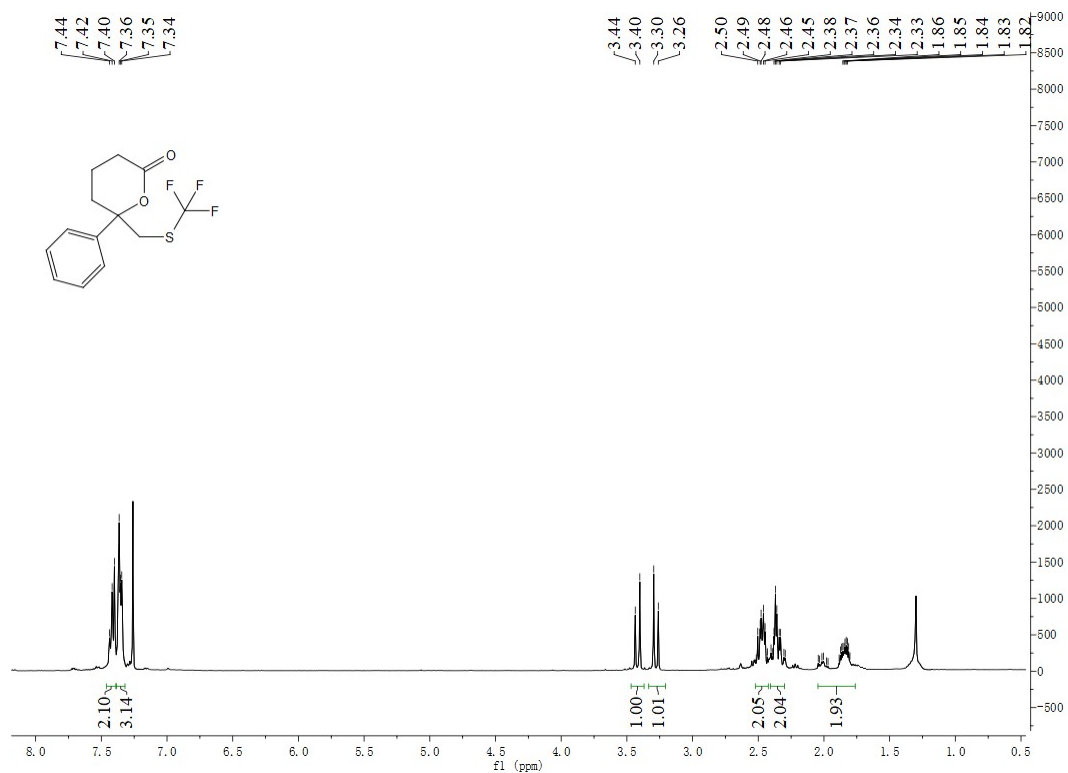

## <sup>13</sup>C NMR

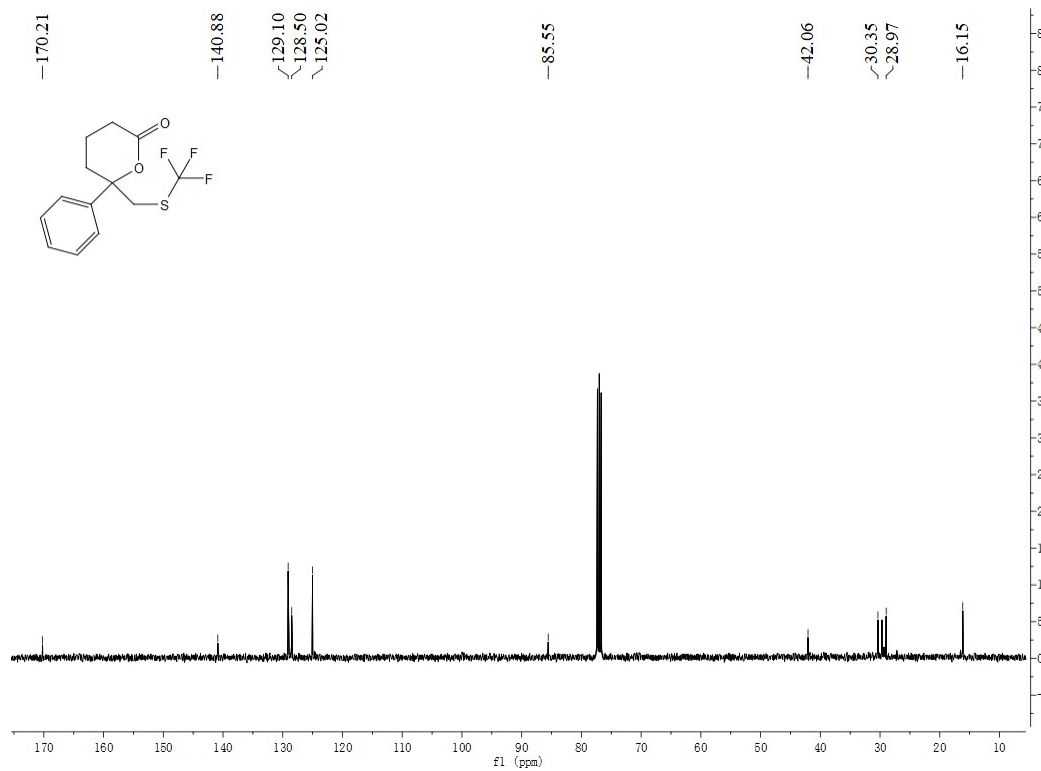



# <sup>19</sup>F NMR

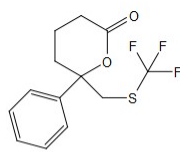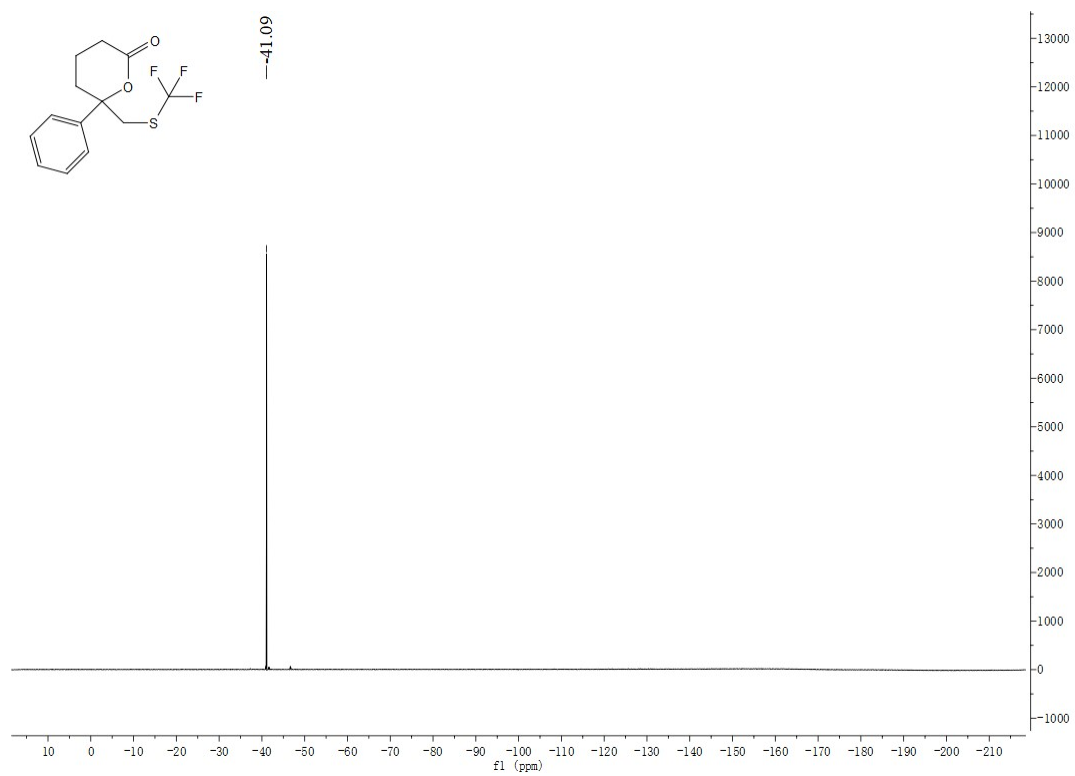

# Compound 3g

## <sup>1</sup>H NMR

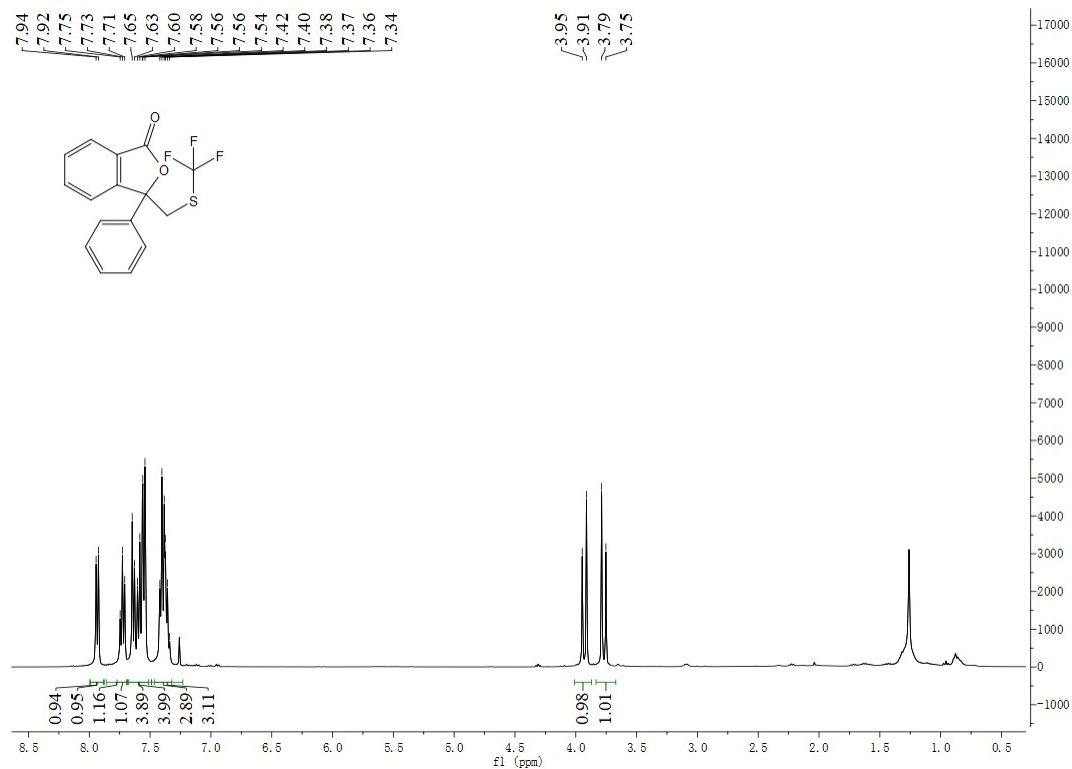

## <sup>13</sup>C NMR

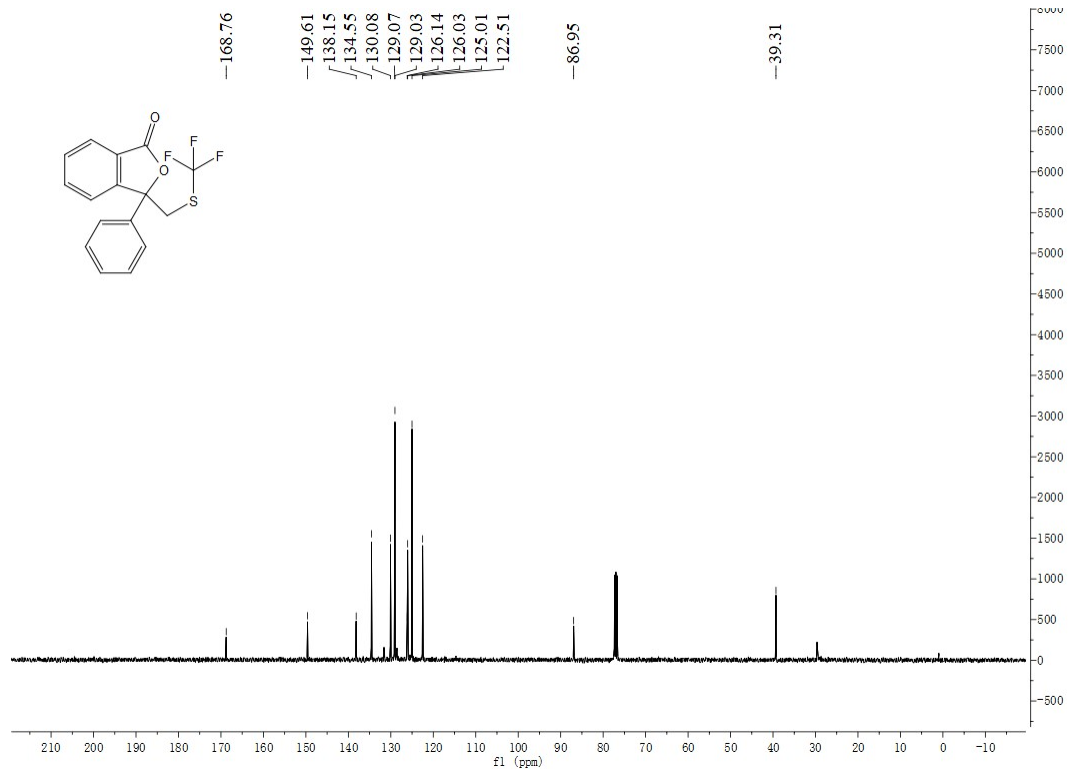

# <sup>19</sup>F NMR

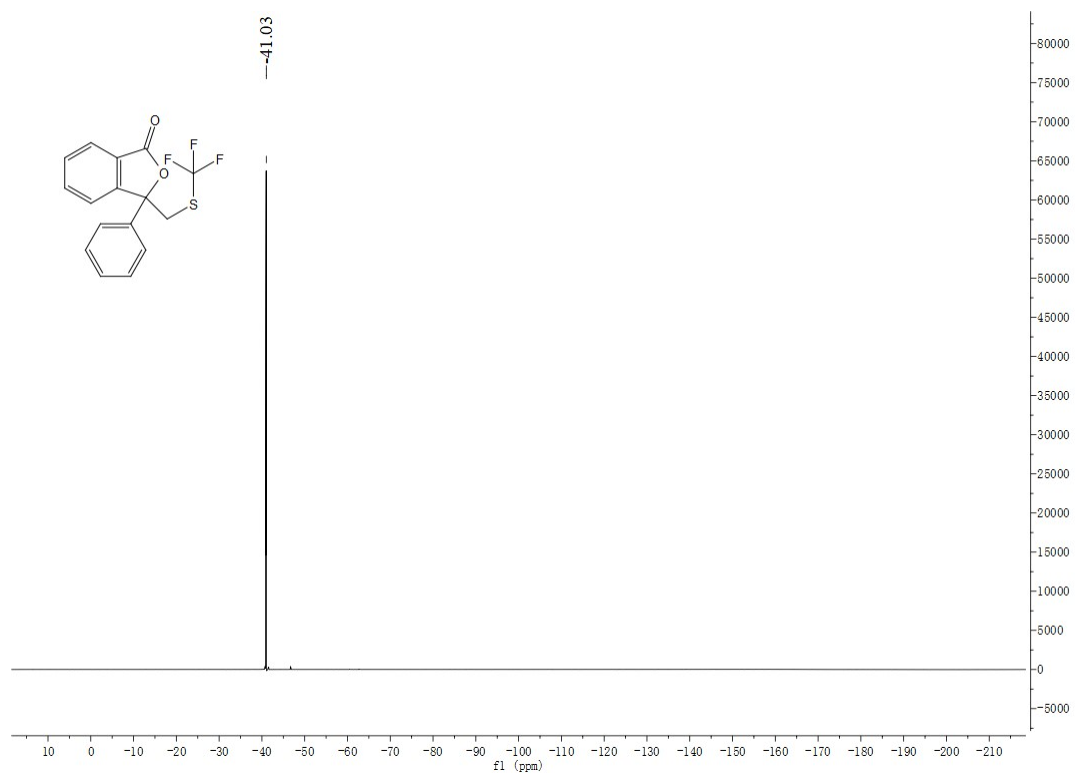

# Compound 3h

## <sup>1</sup>H NMR

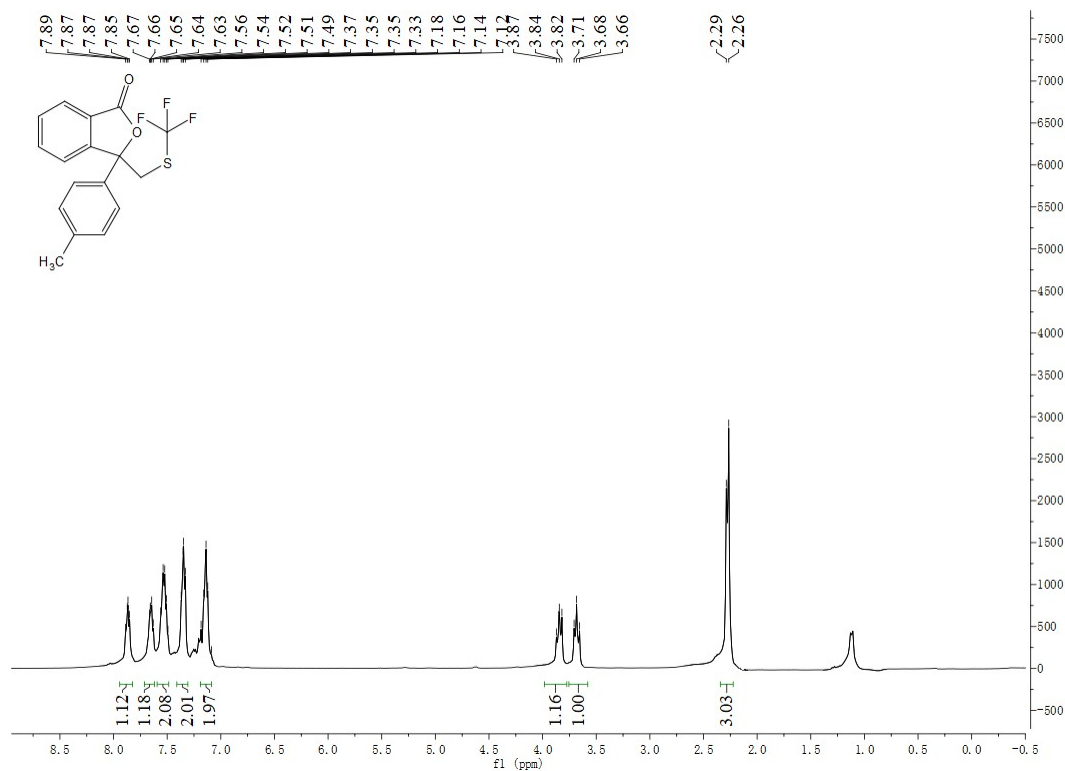

## <sup>13</sup>C NMR

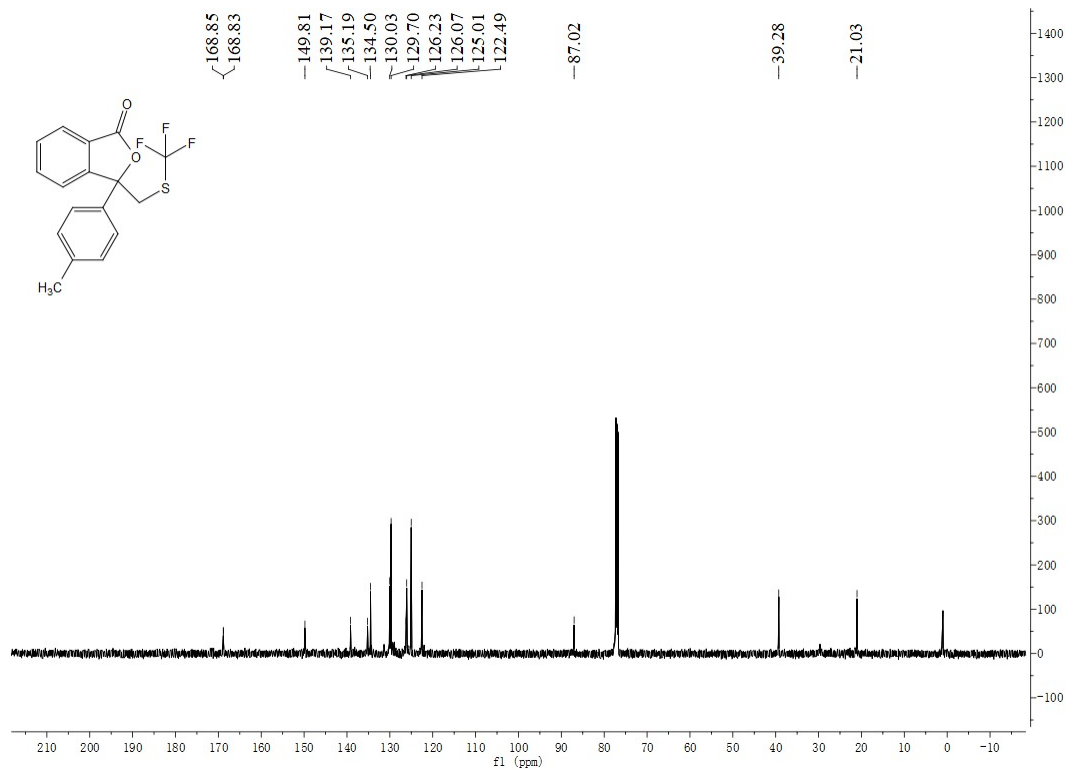

# <sup>19</sup>F NMR

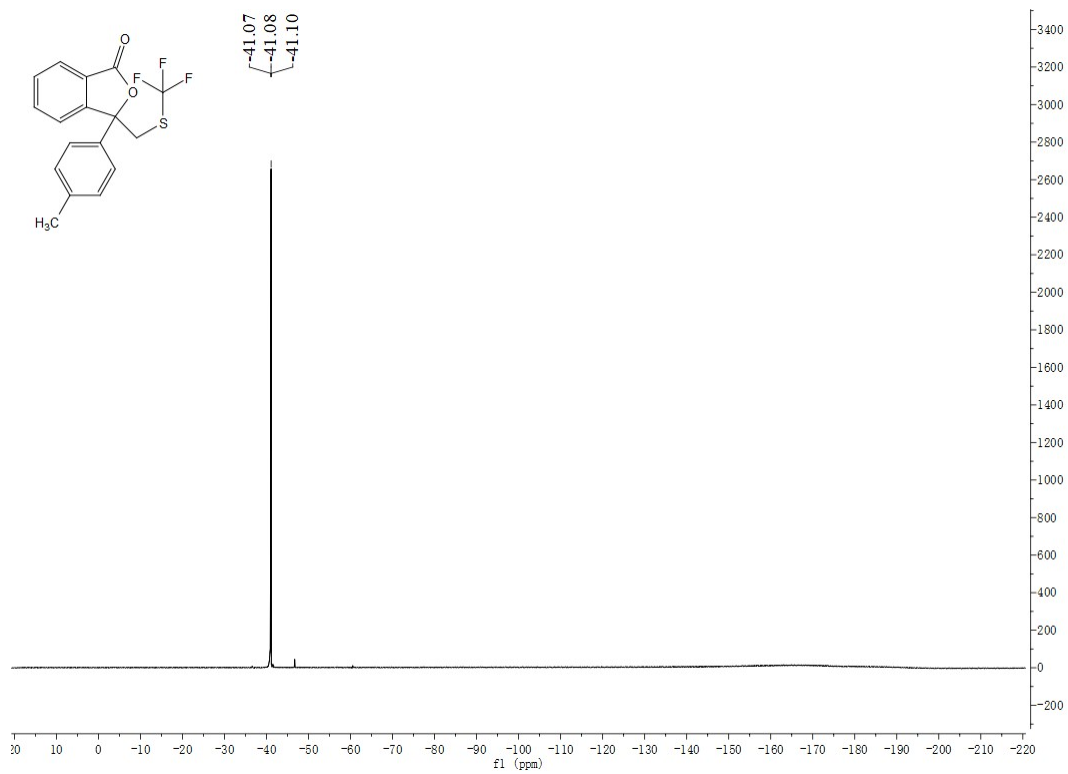

# Compound 3i

## <sup>1</sup>H NMR

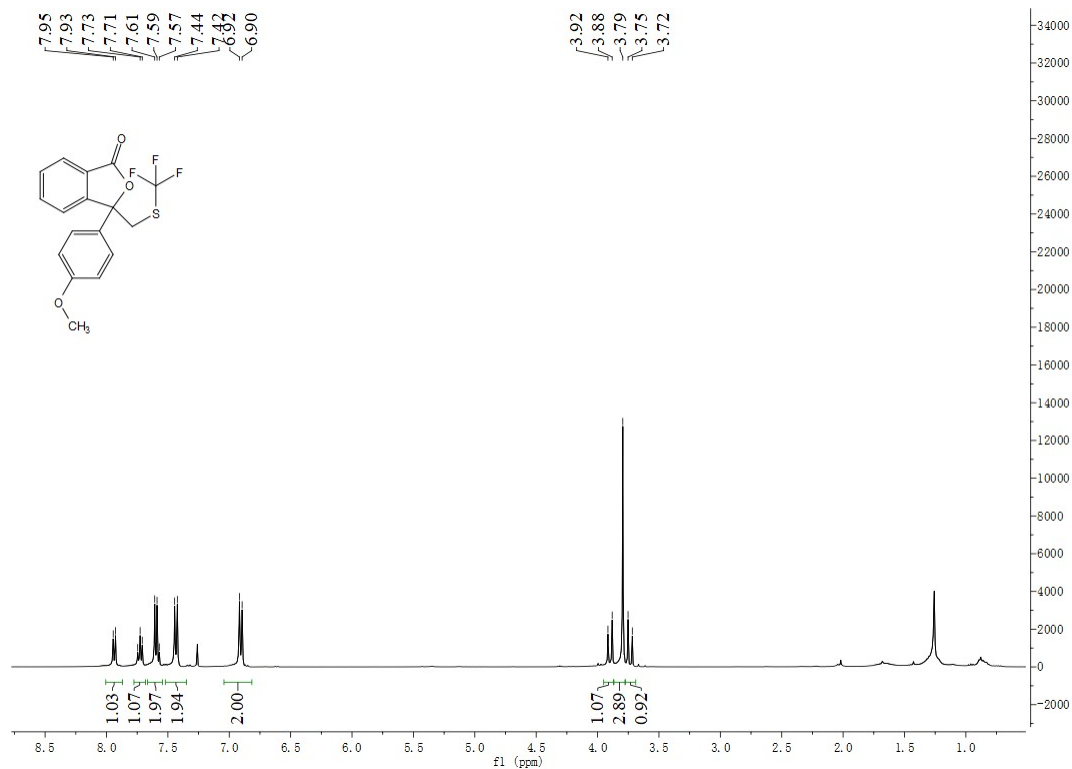

## <sup>13</sup>C NMR

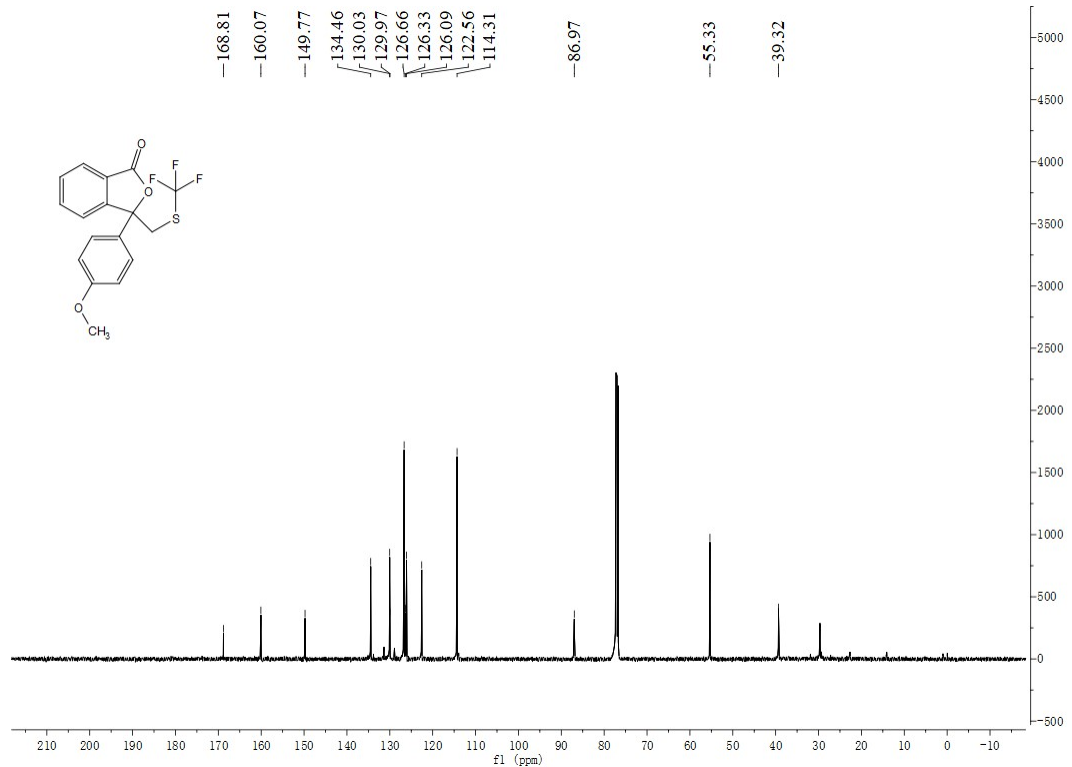

# <sup>19</sup>F NMR

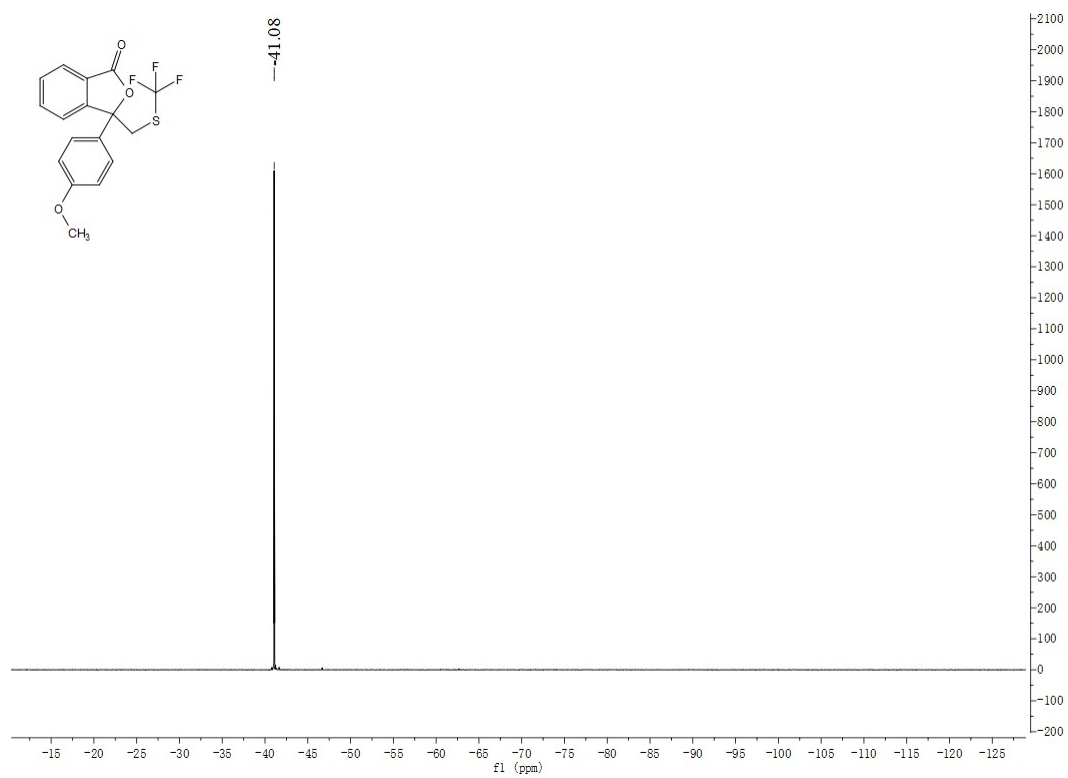

# Compound 3j

## <sup>1</sup>H NMR

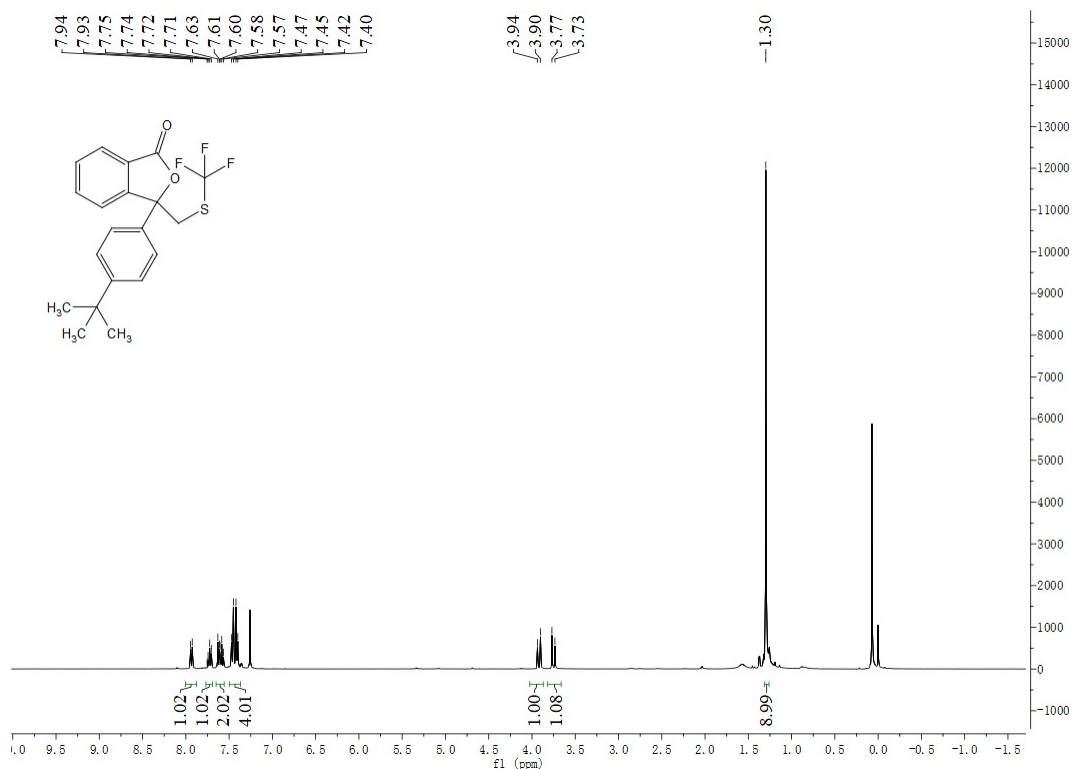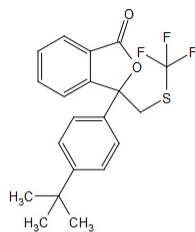

## <sup>13</sup>C NMR

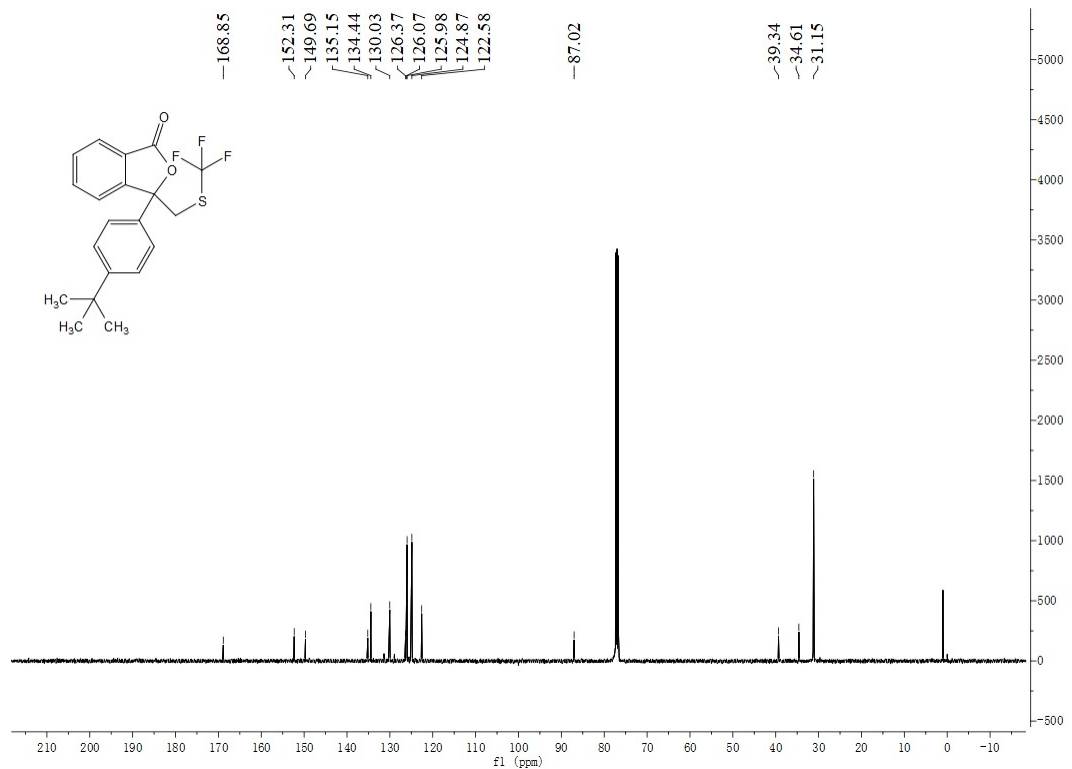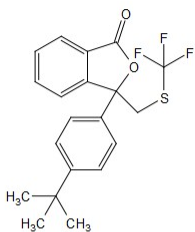



# <sup>19</sup>F NMR

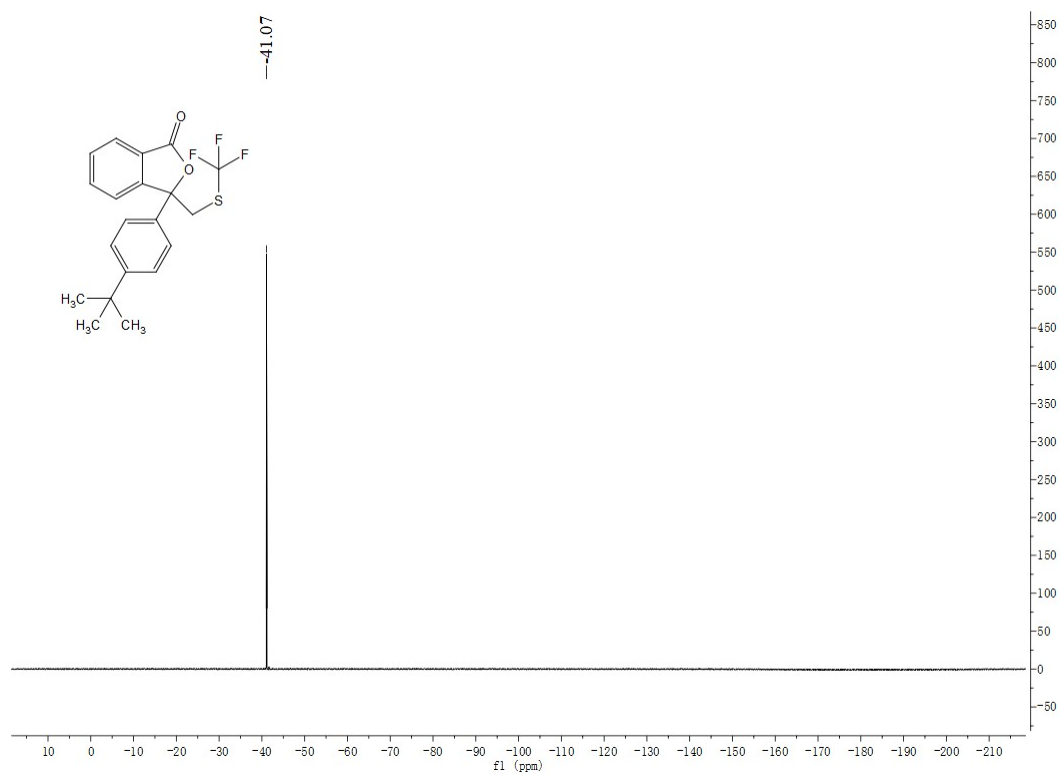

# Compound 3k

## <sup>1</sup>H NMR

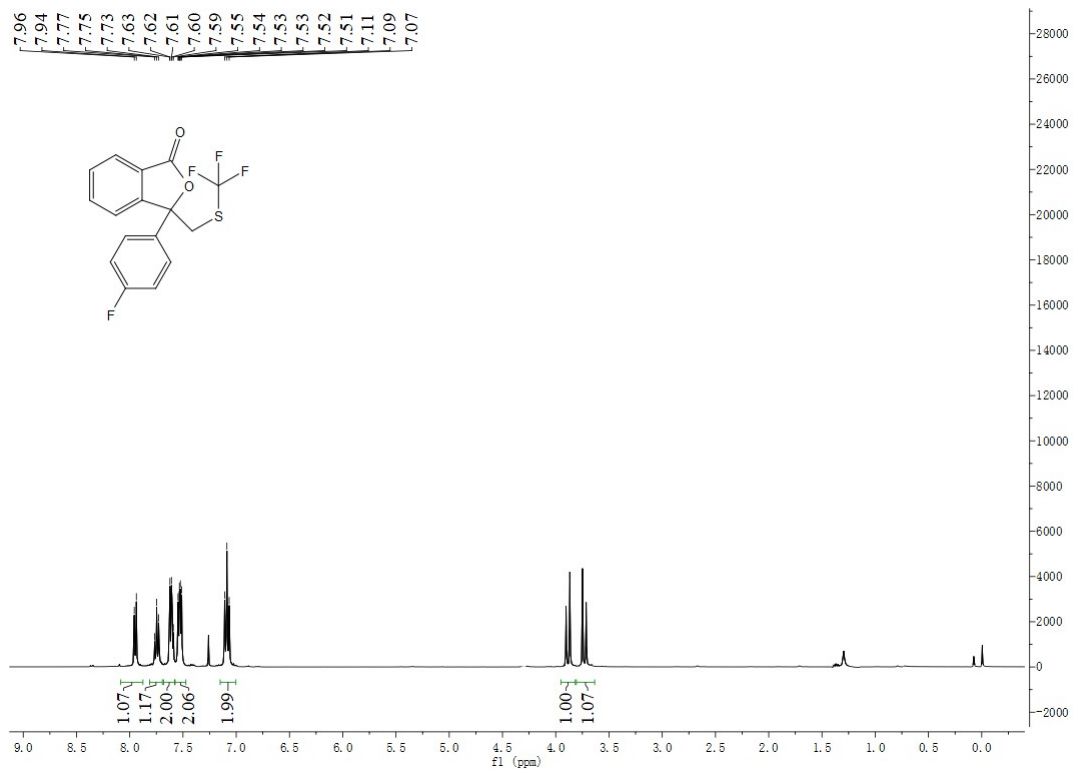

## <sup>13</sup>C NMR

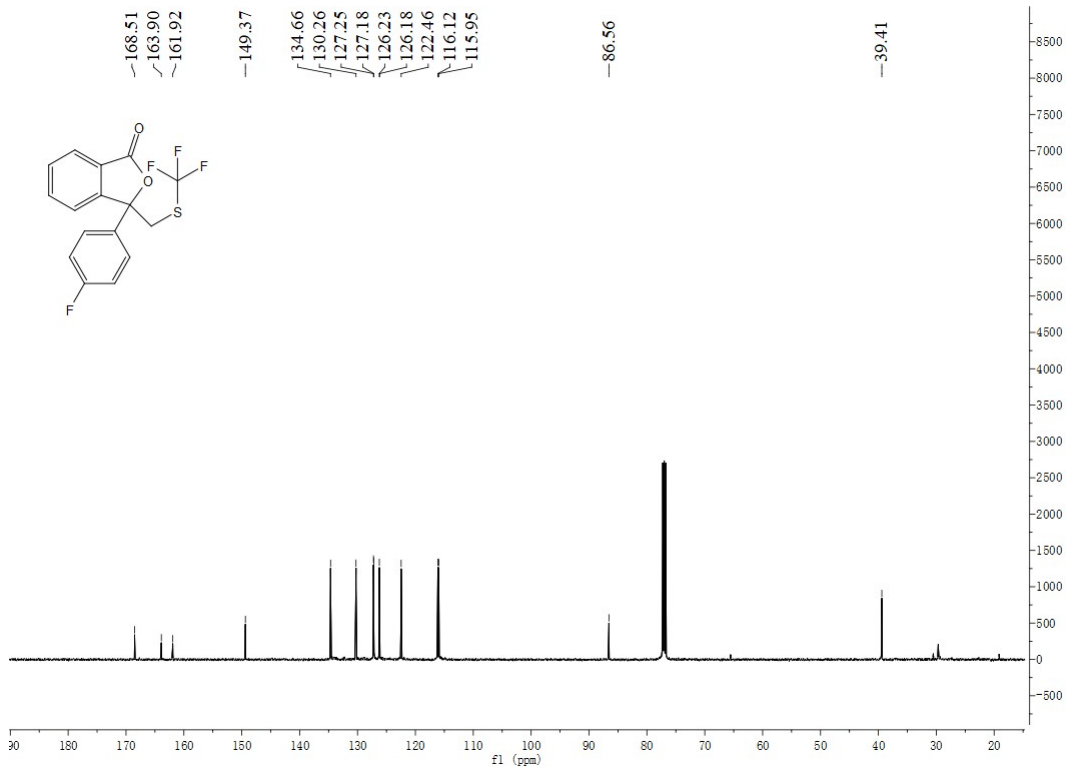

# <sup>19</sup>F NMR

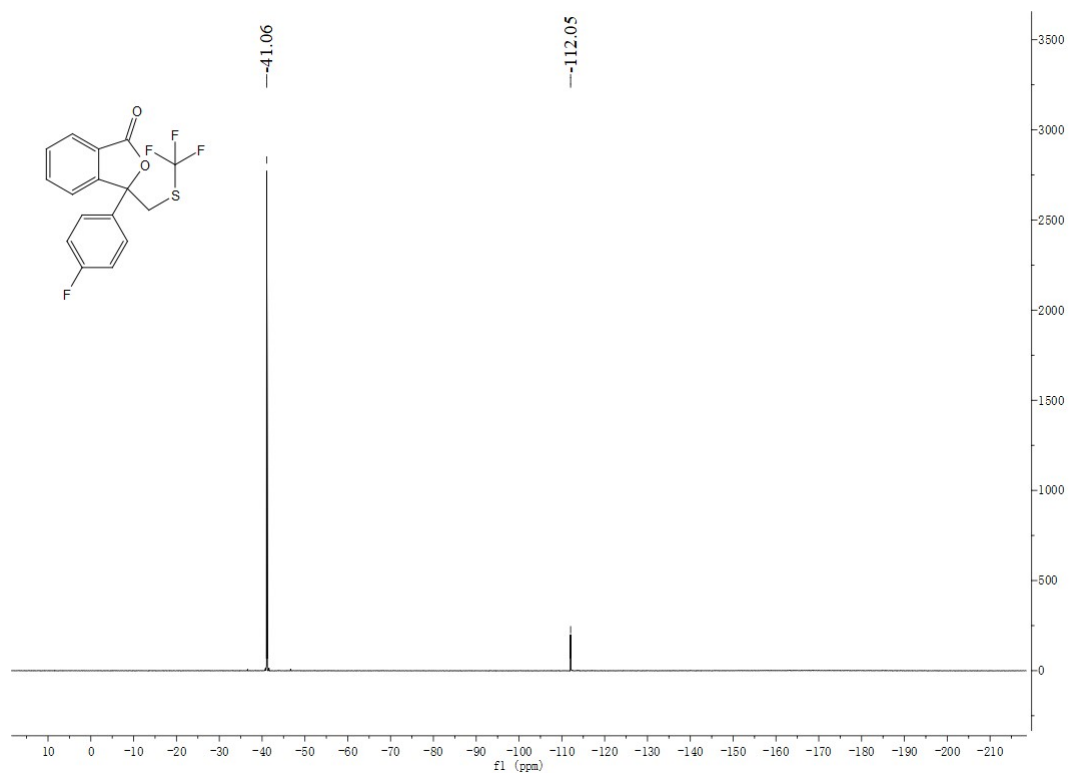

# Compound 31

## <sup>1</sup>H NMR

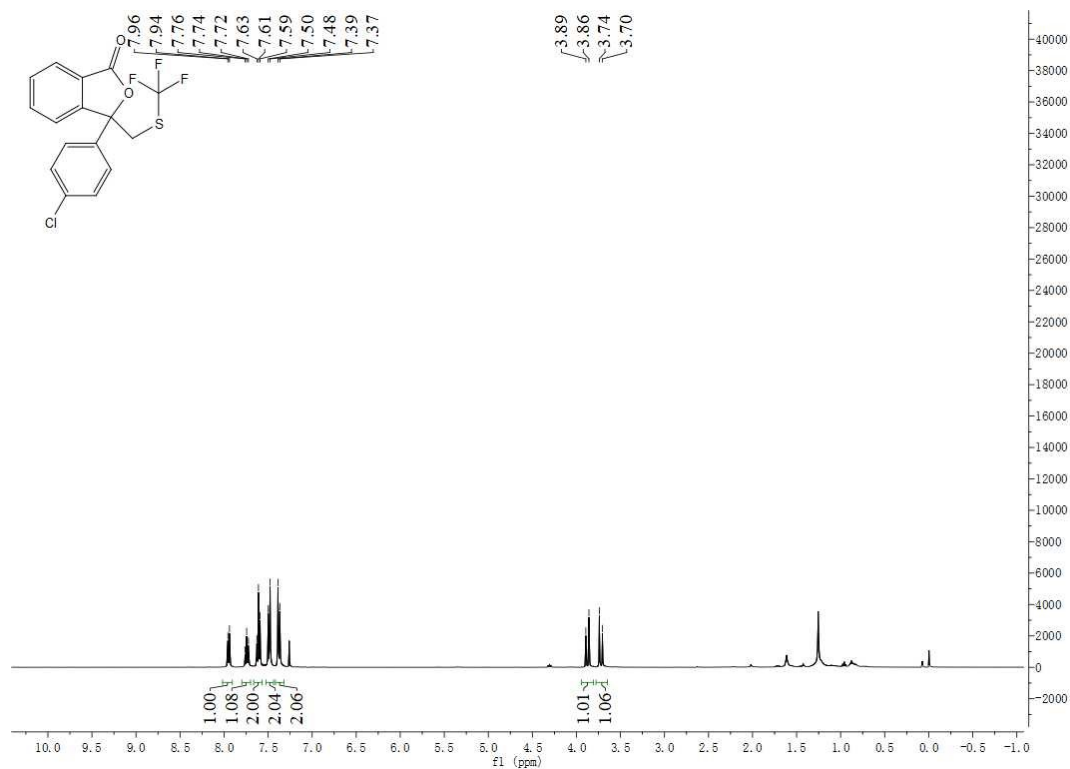

## <sup>13</sup>C NMR

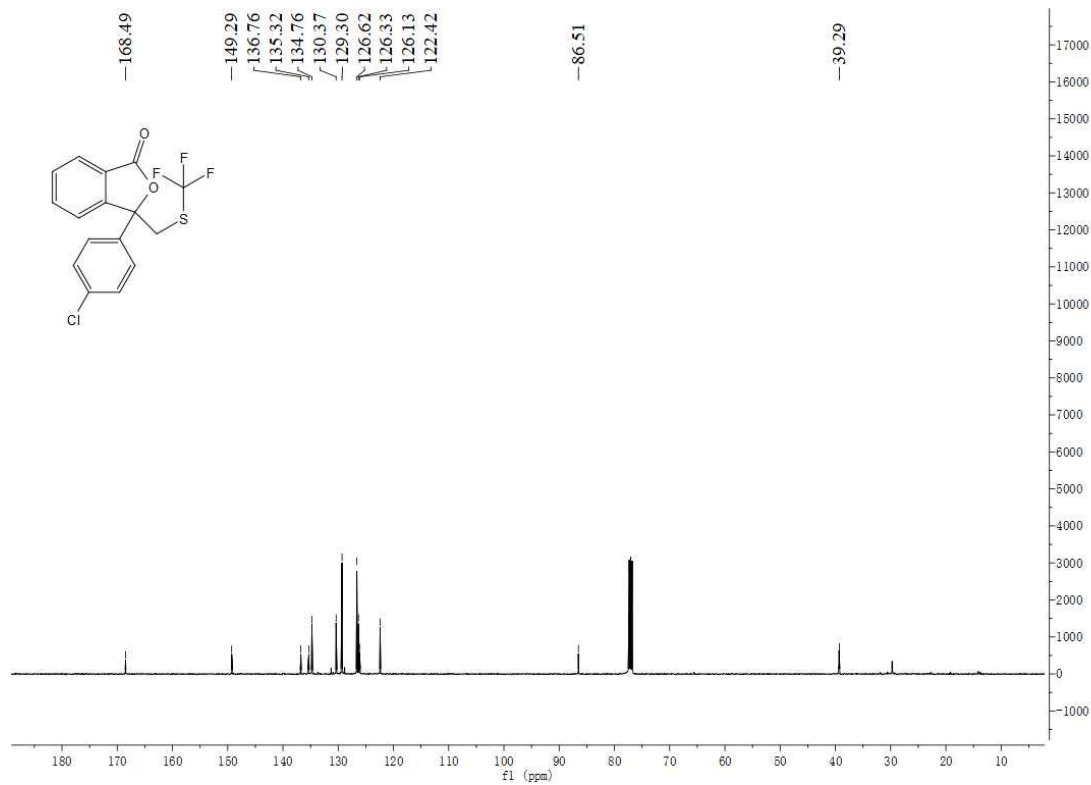

# <sup>19</sup>F NMR

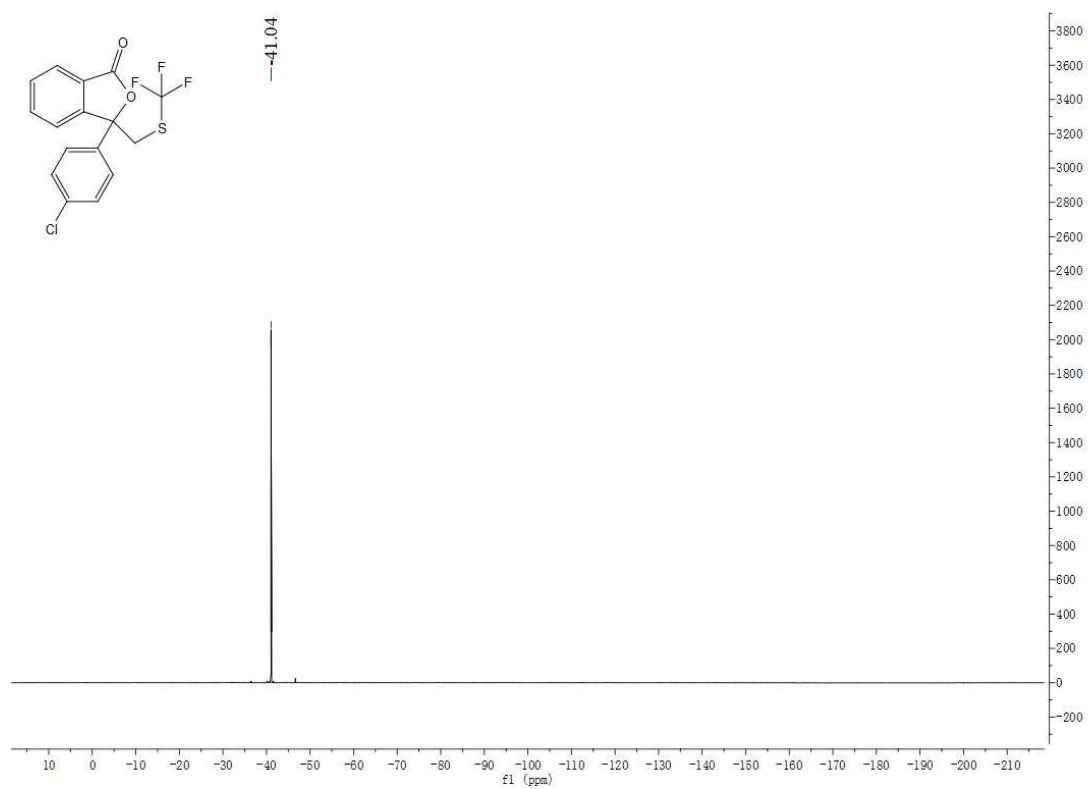

# Compound 3m

## <sup>1</sup>H NMR

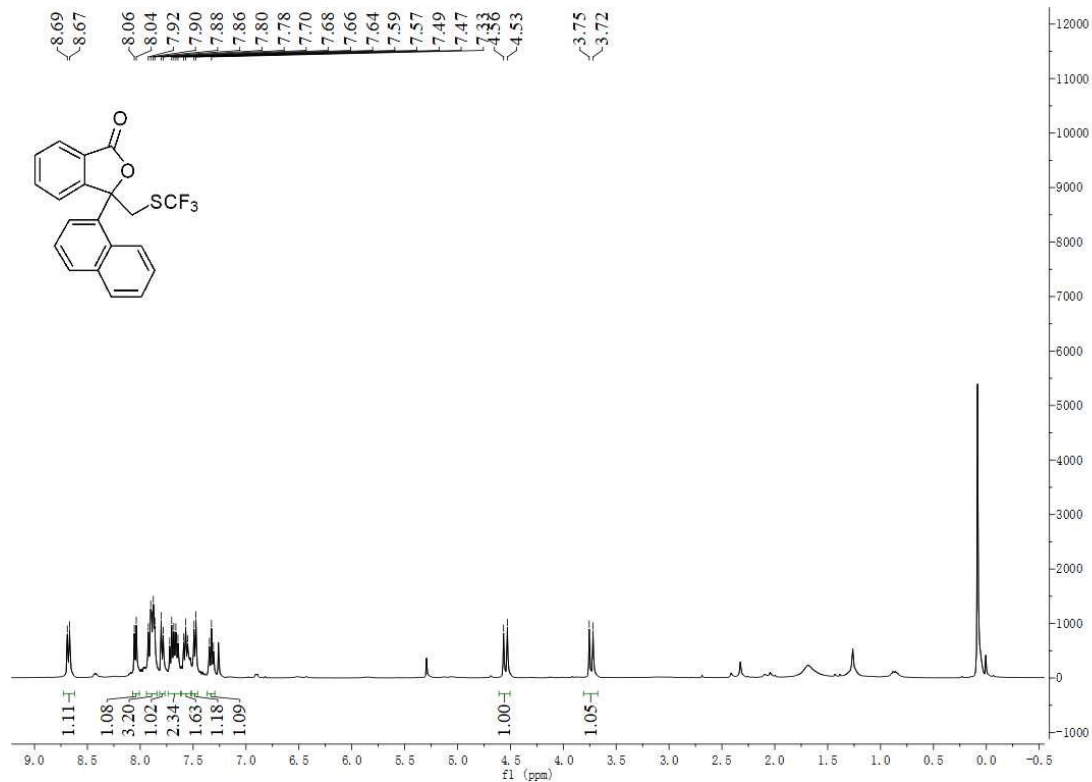

## <sup>13</sup>C NMR

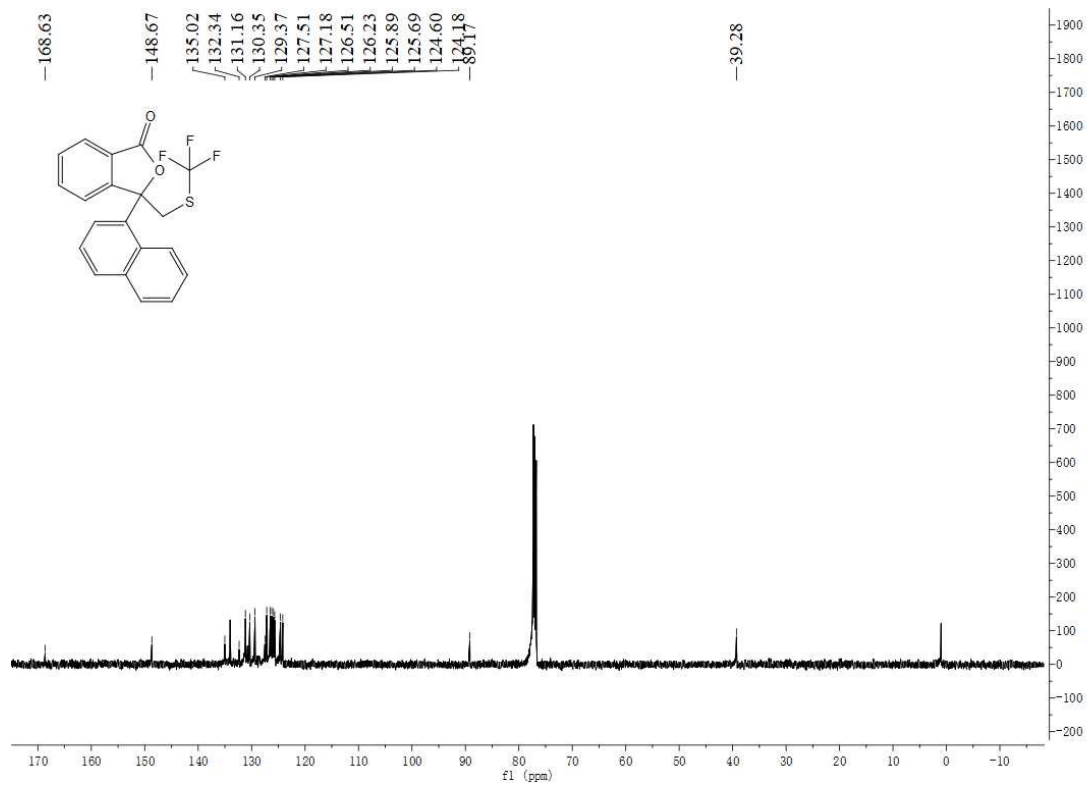

# <sup>19</sup>F NMR

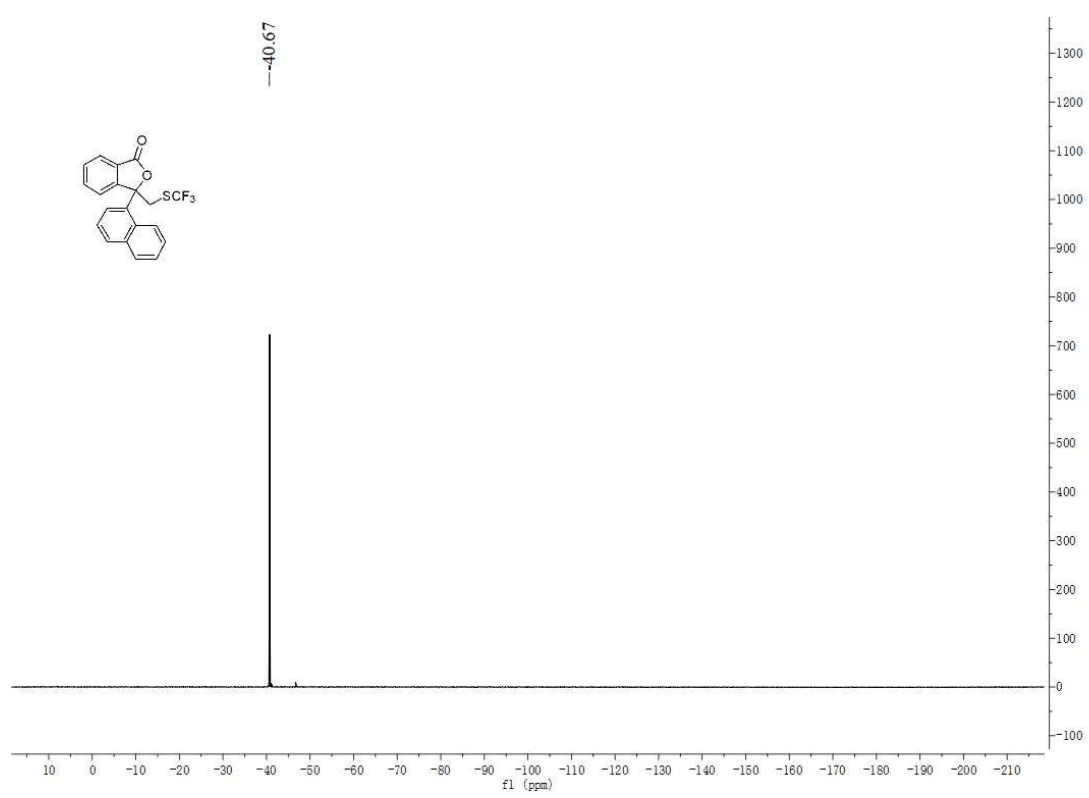

# Compound 3m

## <sup>1</sup>H NMR

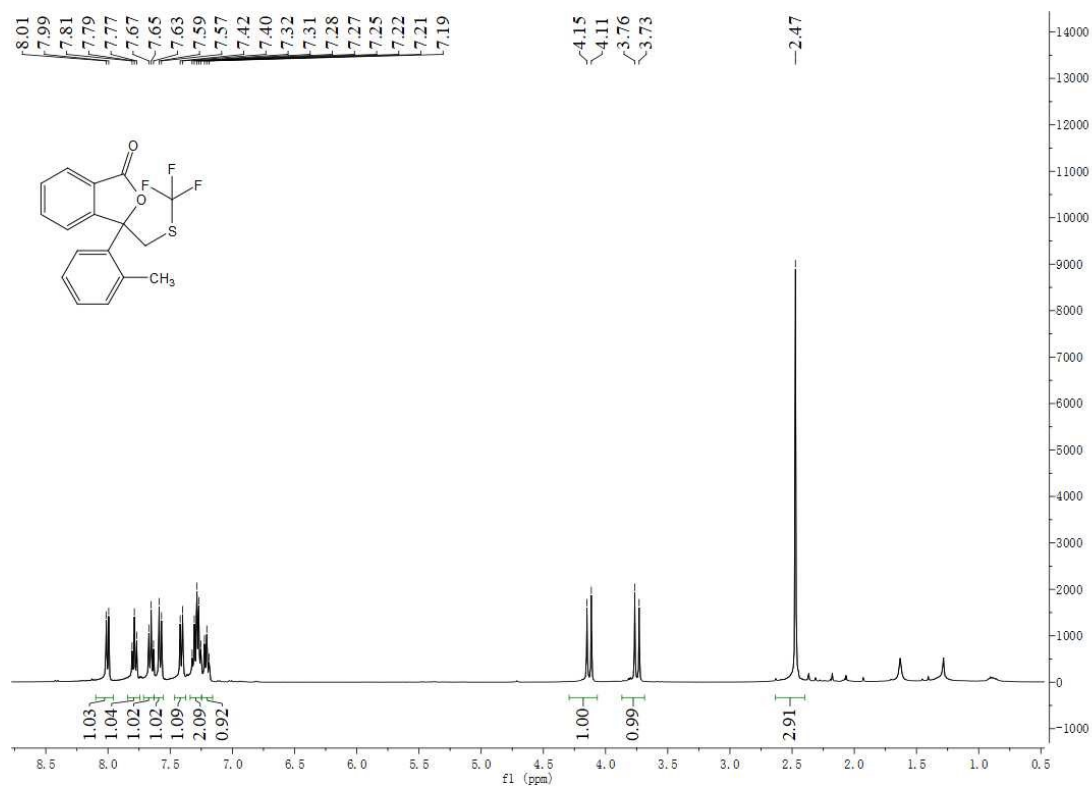

## <sup>13</sup>C NMR

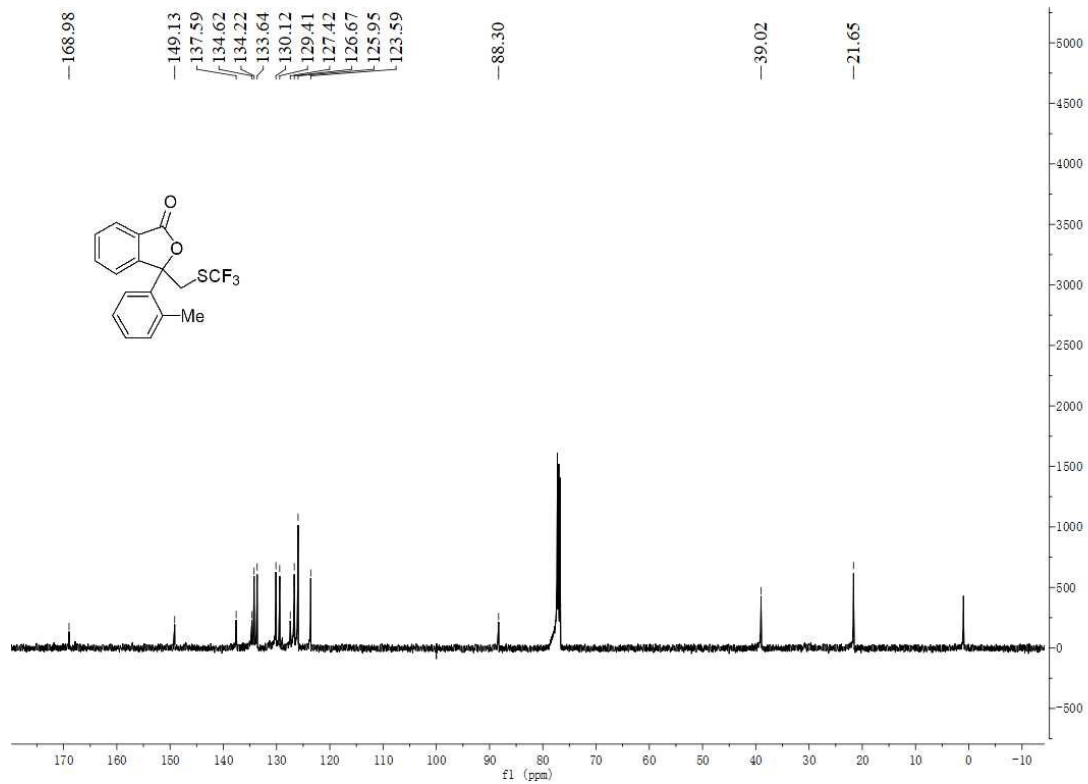



# <sup>19</sup>F NMR

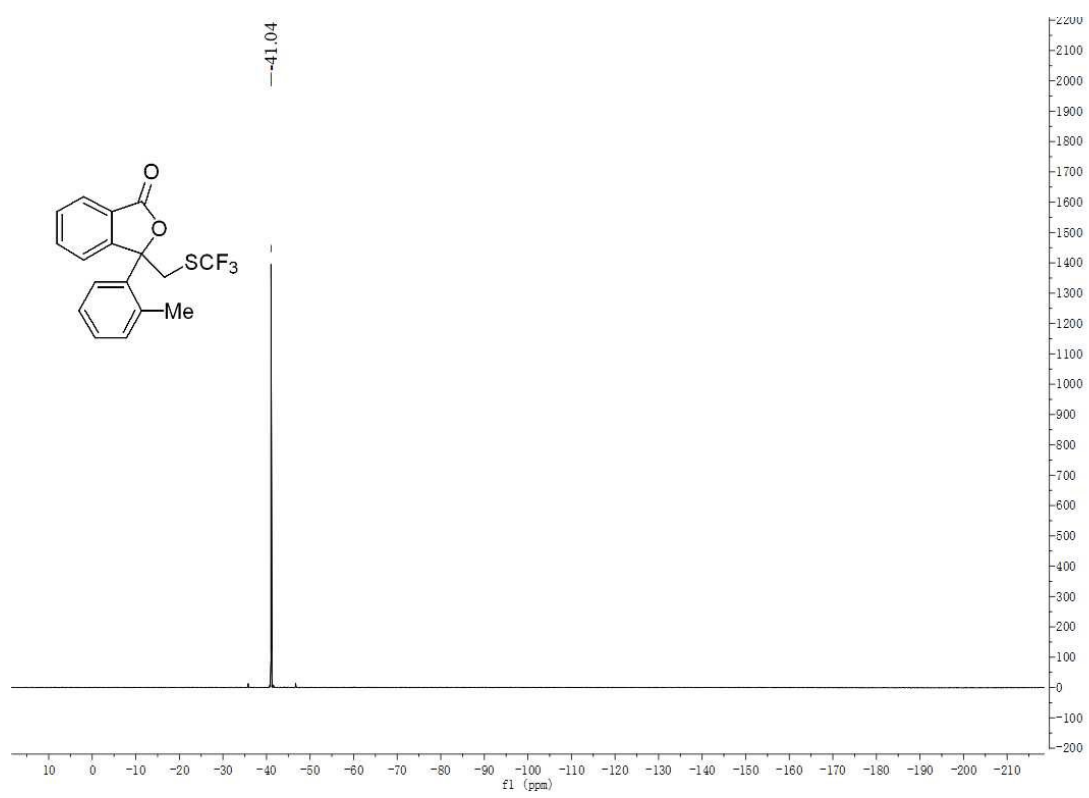

# Compound 3o

## <sup>1</sup>H NMR

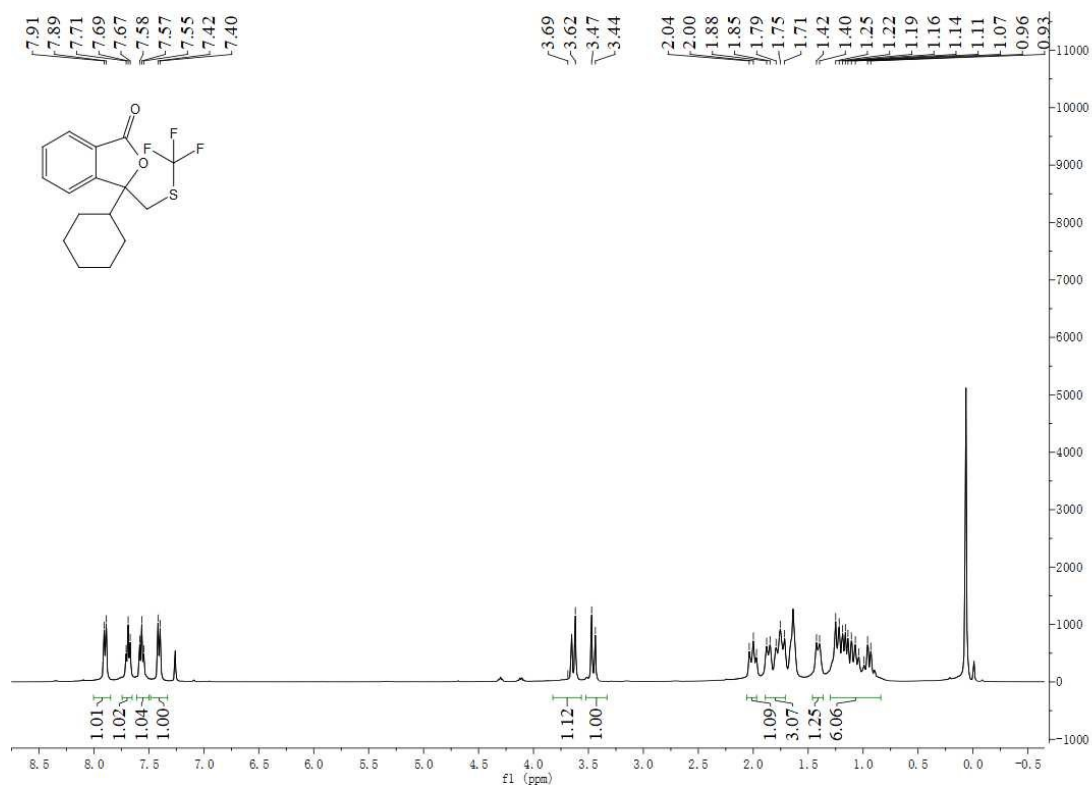

## <sup>13</sup>C NMR

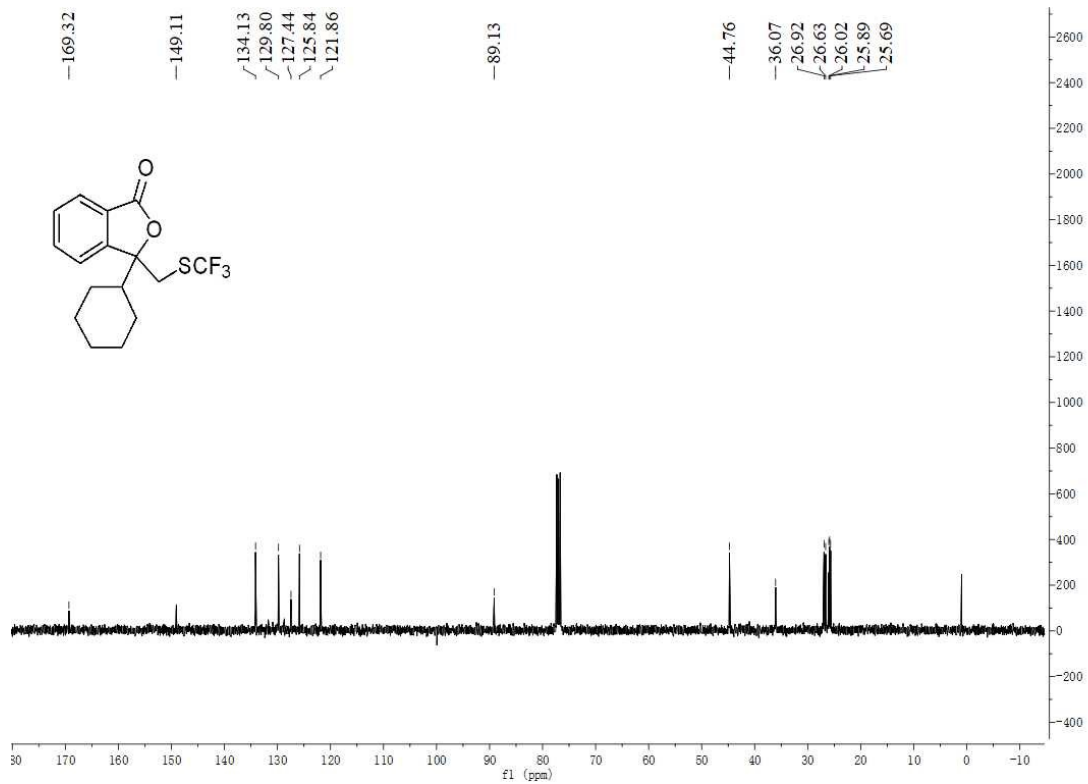

## **$^{19}\text{F}$ NMR**

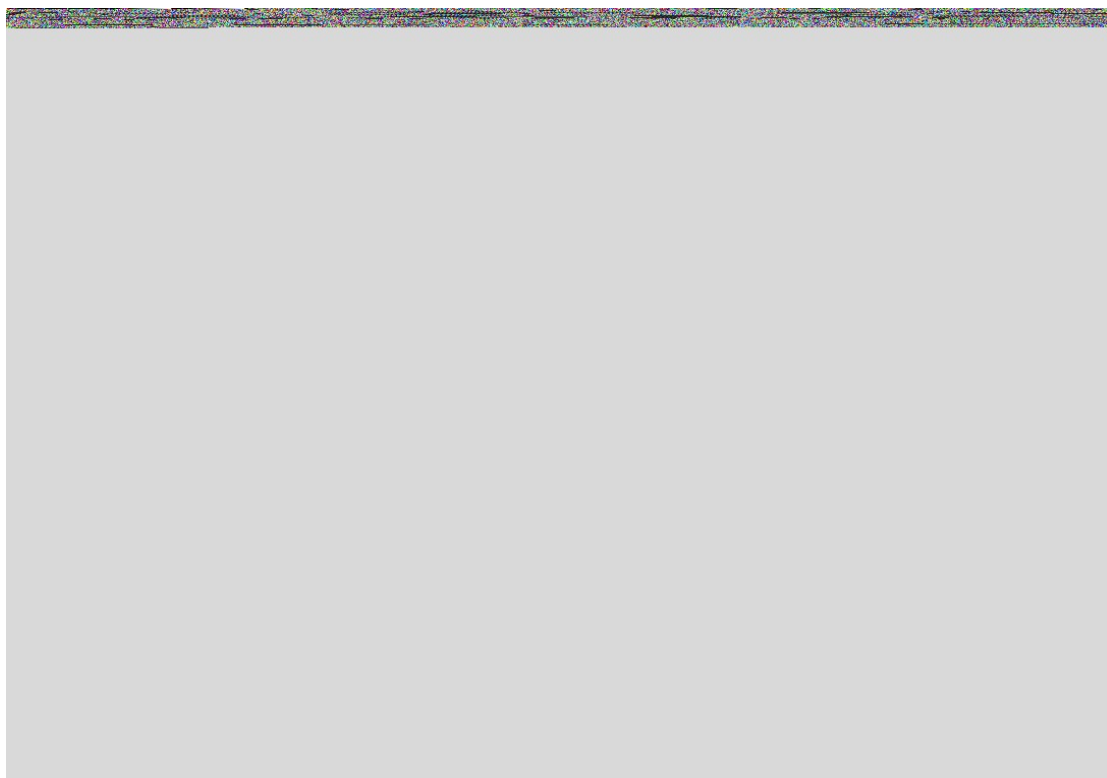

# Compound 3p

## <sup>1</sup>H NMR

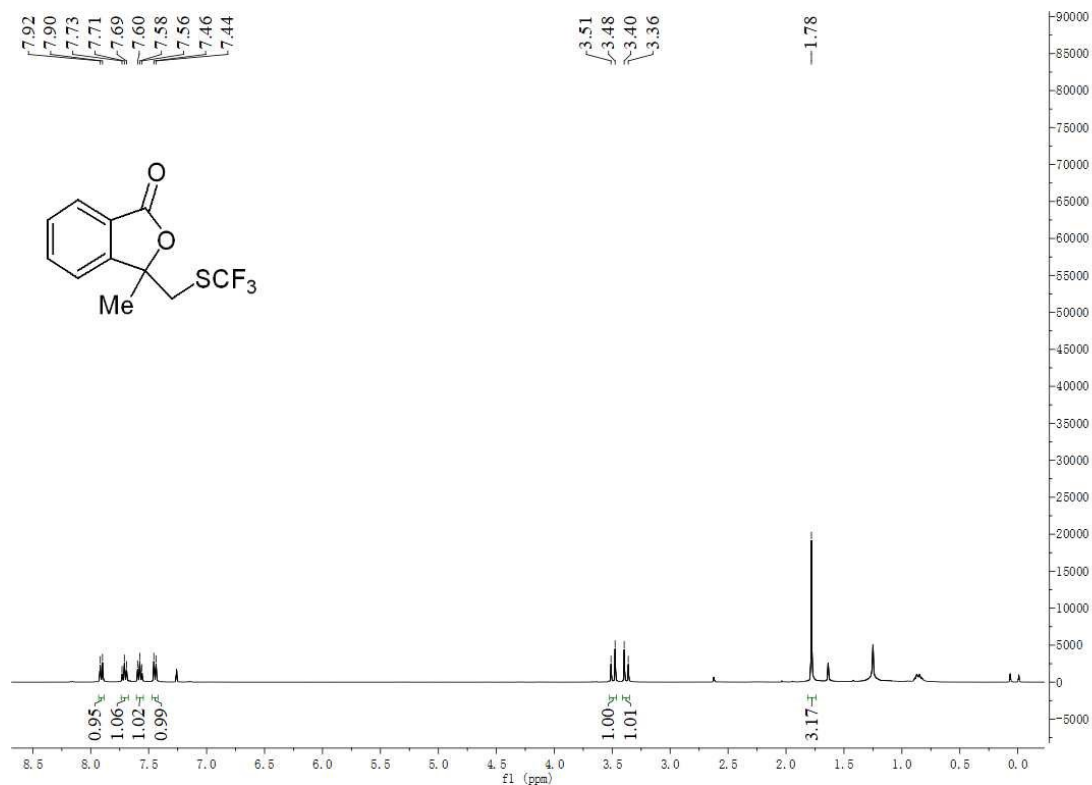

## <sup>13</sup>C NMR

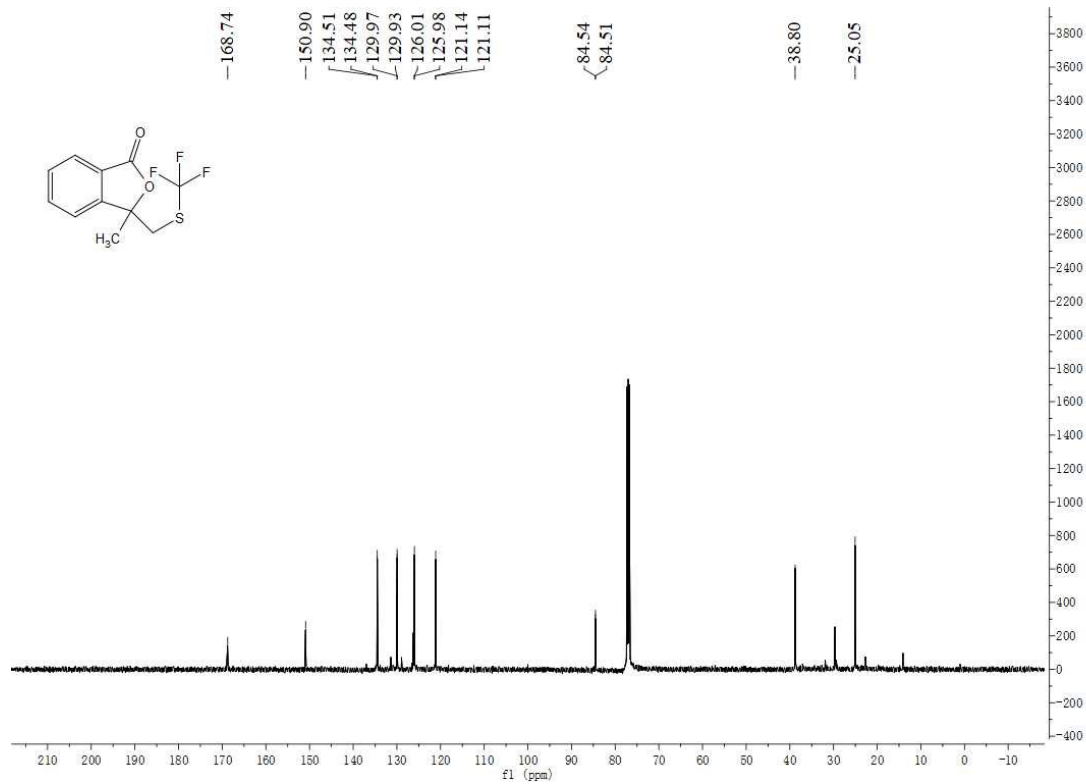

# <sup>19</sup>F NMR

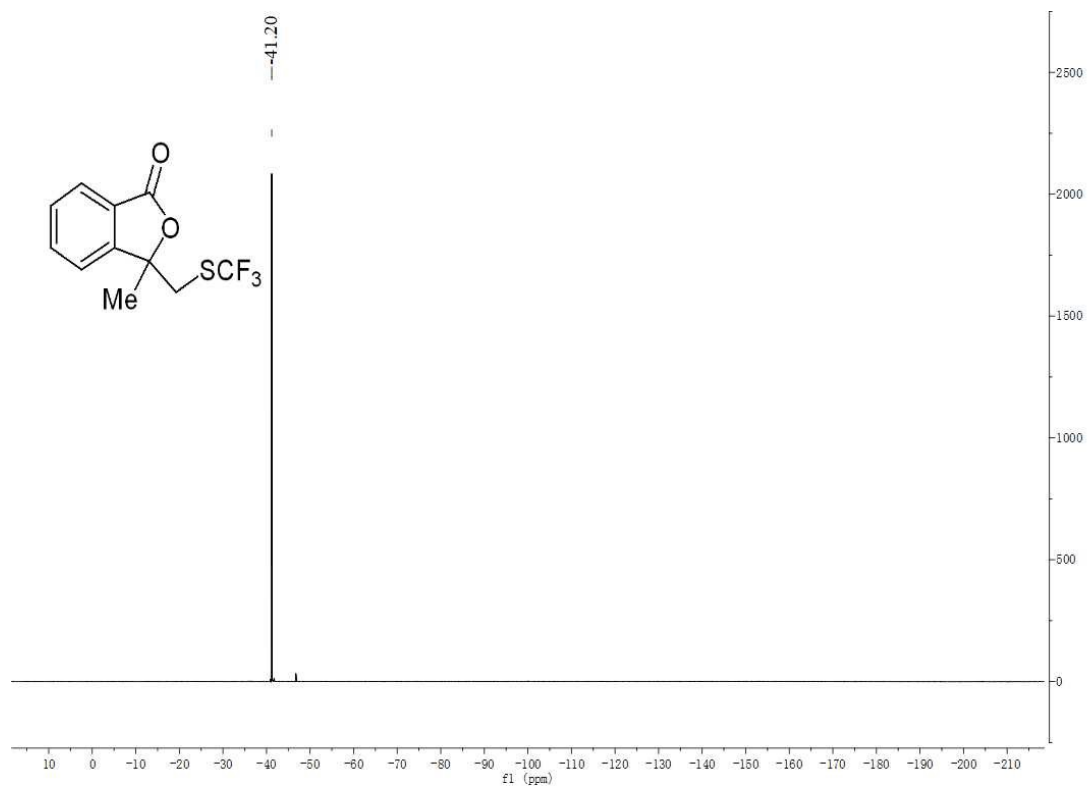

Supplement: d2ob00018k1.pdf [file d2ob00018k1.pdf]
